1 **The endoplasmic reticulum-resident protein TMEM-120/TMEM120A promotes fat**  
2 **storage in *C. elegans* and mammalian cells**

3

4 Yan Li<sup>1</sup>, Siwei Huang<sup>1</sup>, Xuesong Li<sup>2</sup>, Xingyu Yang<sup>1</sup>, Ningyi Xu<sup>3</sup>, Jianan Qu<sup>2</sup>, Ho Yi Mak<sup>1,\*</sup>

5

6 1. Division of Life Science, The Hong Kong University of Science and Technology, Hong  
7 Kong SAR, China.

8 2. Biophotonics Research Laboratory, Department of Electronic and Computer Engineering,  
9 The Hong Kong University of Science and Technology, Hong Kong SAR, China.

10 3. The MOE Key Laboratory of Biosystems Homeostasis & Protection and Innovation Center  
11 for Cell Signaling Network, Life Sciences Institute, Zhejiang University, Hangzhou,  
12 Zhejiang, China.

13

14

15 \* Corresponding author: [hym@ust.hk](mailto:hym@ust.hk) ORCID: 0000-0002-1500-5328

16

17 **Keywords:** TMEM-120, TMEM120A, endoplasmic reticulum, lipid droplets

18 **Abstract**

19 The synthesis of triacylglycerol (TAG) is essential for the storage of excess fatty acids, which  
20 can subsequently be used for energy or cell growth. A series of enzymes act in the  
21 endoplasmic reticulum (ER) to synthesize TAG, prior to its transfer to lipid droplets (LDs),  
22 which are conserved organelles for fat storage. Here, we report that the deficiency of TMEM-  
23 120/TMEM120A, a protein with 6-transmembrane helices, retards TAG synthesis and LD  
24 expansion in *C. elegans*. A missense mutation near the predicted coenzyme A binding site of  
25 TMEM-120 confers strong loss of function phenotypes. GFP fusion proteins of TMEM-120,  
26 expressed at the endogenous level in live worms, were observed throughout the ER network.  
27 Using Stimulated Raman Scattering, we discovered a specific requirement of TMEM-120 in  
28 the storage of exogenous fatty acids in LDs. Knockdown of TMEM120A impedes  
29 adipogenesis of pre-adipocytes in vitro, while its over-expression is sufficient to promote LD  
30 expansion. Pharmacological studies indicate that TMEM120A most likely acts upstream of  
31 diacylglycerol O-acyltransferase 1 (DGAT1). Our results suggest that TMEM-  
32 120/TMEM120A plays a conserved role in increasing the efficiency of TAG synthesis.

## 33 **Introduction**

34 Excess fatty acids from de novo lipogenesis or the diet can be incorporated into  
35 neutral fat, such as triacylglycerol (TAG), via the glycerol-3-phosphate (G3P) or the  
36 monoacylglycerol (MAG) pathway (Yen et al., 2008). Common to both pathways is the  
37 addition of fatty acyl-Coenzyme-A (acyl-CoA) molecules to specific positions of the glycerol  
38 backbone, by acyltransferases (Coleman and Lee, 2004). Based on biochemical and imaging  
39 analyses, all TAG biosynthetic enzymes can be found in the endoplasmic reticulum (ER).  
40 Accordingly, newly synthesized TAG accumulates between ER membrane leaflets before the  
41 directional budding of the cytoplasmic leaflet to form nascent lipid droplets (LDs), which are  
42 conserved organelles for fat storage (Henne et al., 2018; Thiam and Ikonen, 2021; Walther et  
43 al., 2017). Additional TAG synthesis occurs at ER-LD contacts to support LD expansion  
44 (Cao and Mak, 2020; Olzmann and Carvalho, 2019; Schuldiner and Bohnert, 2017).  
45 Although the core ensemble of TAG biosynthetic enzymes have been well-defined, it is  
46 unknown if additional proteins are required for the maximal efficiency of TAG synthesis.

47 TMEM120A (alternatively known as NET29 or TACAN) is a member of a conserved  
48 family of transmembrane proteins that had been assigned seemingly unrelated functions. It  
49 was first reported in a proteomic study of the nuclear envelop (Schirmer et al., 2003).  
50 Subsequent functional analysis indicates that TMEM120A, and its paralog TMEM120B, is  
51 required for the differentiation of 3T3-L1 pre-adipocytes into mature adipocytes (Batrakou et  
52 al., 2015). More recently, TMEM120A was reported to act at the cell surface as an ion  
53 channel that is sensitive to mechanical cues (Beaulieu-Laroche et al., 2020). However, four  
54 independent studies did not support such conclusion (Ke et al., 2021; Niu et al., 2021; Rong  
55 et al., 2021; Xue et al., 2021). Instead, structural and biochemical analyses indicate that  
56 TMEM120A forms a symmetrical homodimer and each protomer binds specifically to a  
57 coenzyme-A (CoASH) molecule (Niu et al., 2021; Rong et al., 2021; Xue et al., 2021). These

58 observations led to the proposal that TMEM120A has an undefined role in lipid metabolism,  
59 which correlates with its requirement for adipogenesis (Batrakou et al., 2015; Czapiewski et  
60 al., 2021).

61 We identified mutant worms that were deficient of the sole *C. elegans* ortholog of  
62 TMEM120A from an unbiased forward genetic screen. Here, we present evidence that *C.*  
63 *elegans* TMEM-120 acts at the ER to promote TAG synthesis.

## 64 **Results and Discussion**

### 65 **TMEM-120 is required for TAG accumulation and LD expansion**

66 We have previously shown that lipid droplets (LDs) undergo continuous expansion in  
67 *C. elegans daf-22*/thiolase mutant worms, owing to a block in the peroxisomal  $\beta$ -oxidation  
68 pathway (Zhang et al., 2010). These worms accumulate more triacylglycerol (TAG), which is  
69 synthesized by the concerted action of ACS-22/acyl-CoA synthetase and DGAT-  
70 2/diacylglycerol O-acyltransferase (Xu et al., 2012). Accordingly, loss of *acs-22* or *dgat-2*  
71 function attenuates LD expansion of *daf-22* mutant worms. In a genetic screen for additional  
72 *daf-22* suppressors, we identified a complementation group that consisted of two recessive  
73 alleles, *hj49* and *hj50*. Molecular cloning revealed lesions in a gene annotated as M01G5.3,  
74 hereafter named *tmem-120*, which encodes a predicted transmembrane protein that is  
75 homologous to mammalian TMEM120A and TMEM120B (Batrakou et al., 2015) (Fig. S1A).  
76 The *hj50* nonsense allele (Glutamine 290 to amber) caused ~90% reduction of *tmem-120*  
77 mRNA level (Fig. S1A-B), possibly due to nonsense mediated decay. Therefore, it is a strong  
78 loss of function allele. The *hj49* missense allele caused the substitution of a conserved  
79 Glycine to Glutamate (G195E) (Fig. S1A). Based on the recently determined structures of  
80 TMEM120A, this conserved Glycine residue locates in a flexible linker immediately N-  
81 terminal to a coenzyme-A (CoASH) binding site (Niu et al., 2021; Rong et al., 2021; Xue et  
82 al., 2021). Therefore, its replacement with Glutamate may alter the conformation of the linker  
83 and in turn affect the orientation of residues that constitute the CoASH binding site (including  
84 W193 of human TMEM120A and W197 of *C. elegans* TMEM-120). Since the phenotypes of  
85 mutant worms carrying *hj49* and *hj50* were indistinguishable (Fig. S1C-E), we concluded that  
86 the G195E substitution severely compromised TMEM-120 function. In subsequent  
87 experiments, we used worms carrying the *hj50* nonsense allele for phenotypic analysis.

88 To visualize LDs of wild type and mutant animals, we used a recently developed  
89 Stimulated Raman Scattering (SRS) microscopy system (Li et al., 2015). We focused on  
90 detecting C-H bond vibration from TAG, which was highly concentrated in LDs. In  
91 agreement with previous results based on the use of vital dye or fluorescent protein markers  
92 (Xu et al., 2012), LDs in *daf-22* mutant worms were larger than those in wild type worms  
93 (Fig. 1A). The loss of TMEM-120 function reduced LD size and blocked LD expansion in  
94 wild type and *daf-22* mutant worms (Fig. 1A and C). Similar results were observed when we  
95 used DHS-3::mRuby as a fluorescent LD marker (Zeng et al., 2020) (Fig. 1F). Next, we  
96 quantified SRS signals, which were proportional to TAG content (Wang et al., 2011). We  
97 detected 23% more SRS signals in *daf-22* mutant than wild type worms (Fig. 1B and D). In  
98 contrast, *tmem-120* and *daf-22; tmem-120* mutant worms have 26% and 14% less SRS signals  
99 than wild type worms, respectively (Fig. 1B and D). To complement our imaging approach,  
100 we used liquid chromatography-mass spectrometry (LC-MS) to determine that *tmem-120*  
101 mutant worms had almost 40% less TAG than wild type worms (Fig. 1E). Such reduction of  
102 TAG was unlikely due to an alteration of feeding rate (Fig. S1F). Taken together, our results  
103 indicate that TMEM-120 supports TAG accumulation and LD expansion.

104 Next, we sought to determine if mouse TMEM120A plays a conserved role in  
105 regulating fat storage, even though it was reported to be a mechanosensory channel  
106 (Beaulieu-Laroche et al., 2020). To this end, we expressed mouse TMEM120A in *daf-22;*  
107 *tmem-120* mutant worms. We found that TMEM120A could rescue the LD phenotype in a  
108 similar manner as *C. elegans* TMEM-120 (Fig. 1F). As a result, large LDs re-appeared in  
109 intestinal cells of *daf-22; tmem-120* mutant worms. Therefore, we conclude that TMEM-120  
110 and TMEM120A share a deeply conserved function of regulating cellular fat storage.

111

## 112 **TMEM-120 promotes the incorporation of fatty acids into TAG**

113           The cellular neutral lipid homeostasis is dependent on a balance between TAG  
114 synthesis and mobilization at LDs. The TAG synthesis in turn relies on the availability of  
115 dietary or de novo synthesized fatty acids. We sought to determine if the decrease in neutral  
116 lipid content was caused by a decrease in TAG accumulation or accelerated TAG  
117 mobilization by lipolysis in *tmem-120* mutant worms. To differentiate these possibilities, we  
118 used Stimulated Raman Scattering (SRS) to detect exogenously supplied deuterium-labeled  
119 fatty acids (Fu et al., 2014; Li et al., 2019). We tuned our system to detect C-D bond  
120 vibrations to avoid the interference from endogenous fatty acids. To measure TAG  
121 accumulation, we fed young adult wild type and mutant worms with deuterium-labeled  
122 monounsaturated oleic acid (OA-d<sub>34</sub>) and imaged live worms by SRS at regular intervals over  
123 a period of 30 hours (Fig. 2A). We detected progressive increase of SRS signals from LDs in  
124 both strains tested (Fig. 2C). However, the rate of increase in *tmem-120* worms was  
125 significantly slower than that in wild type worms (Fig. 2E). Similar observations were made  
126 when worms were fed deuterium-labeled saturated palmitic acid (PA-d<sub>31</sub>) (Fig. S2A, C and  
127 E). We conclude that loss of TMEM-120 function impairs the incorporation of exogenous  
128 fatty acids into TAG.

129           To measure lipolysis, we fed newly hatched larval stage L1 worms with deuterium-  
130 labeled monounsaturated oleic acid (OA-d<sub>34</sub>) until they reached the young adult stage. We  
131 then removed labeled fatty acids from the diet of these animals and imaged them by SRS at  
132 regular intervals (Fig. 2B). The dissipation of SRS signals over time reflected the rate of  
133 lipolysis, as the labeled fatty acids stored as TAG in LDs were metabolized. We found that  
134 the rate of decrease of SRS signals was not significantly different between wild type and  
135 *tmem-120* mutant worms (Fig. 2D and F). Similar observations were made when worms were  
136 fed with saturated palmitic acid (PA-d<sub>31</sub>) (Fig. S2B, D and F). We conclude that lipolysis is

137 not altered in *tmem-120* mutant worms. Taken together, our results indicate that the reduction  
138 of neutral lipid content in these animals was primarily due to the retardation of fatty acid  
139 incorporation into TAG.

140

#### 141 **TMEM-120 is an ER resident protein**

142         Based on TOPCONS analysis (Tsirigos et al., 2015), the *C. elegans* TMEM-120 and  
143 its human orthologs share the same predicted membrane topology, with their N- and C-  
144 termini facing the cytoplasm (Fig. 3A). According to its cryo-EM structure, membrane  
145 embedded TMEM120A has 6 transmembrane helices and forms homodimers (Ke et al., 2021;  
146 Niu et al., 2021; Rong et al., 2021; Xue et al., 2021). Intriguing, a consensus has yet to  
147 emerge regarding the subcellular localization of TMEM120A. Mammalian TMEM120A was  
148 previously reported to reside at the nuclear envelope (Batrakou et al., 2015) or the  
149 endoplasmic reticulum (ER) (Cho et al., 2020). In contrast, the assignment of TMEM120A as  
150 a mechanosensory channel placed it at the plasma membrane (Beaulieu-Laroche et al., 2020).  
151 We sought to determine the localization of *C. elegans* TMEM-120 when it was expressed at  
152 the endogenous level in live animals. To this end, we used CRISPR mediated genome editing  
153 (Arribere et al., 2014) to insert the coding sequence of the green fluorescent protein (GFP)  
154 into the endogenous *tmem-120* locus (Fig. 3B). We generated two independent knockin  
155 alleles, *hj239* and *hj270* (Fig. 3B). In one strain, GFP was fused to the N-terminus of TMEM-  
156 120 via a flexible linker. In a second strain, GFP was expressed as part of the predicted C-  
157 terminal cytoplasmic tail, leaving the extreme C-terminus unaltered. This design was  
158 necessitated by the presence of a KxHxx motif at the C-terminus of TMEM-120, which could  
159 function similarly as the KxKxx motif for ER retention (Jackson et al., 1990; Ma and  
160 Goldberg, 2013). Both TMEM-120 fusion proteins were functional because their expression



161 did not significantly alter the lipid content of *daf-22* mutant worms, as observed when the  
162 function of TMEM-120 was lost (Fig. S3A-B). We used established markers of intestinal ER  
163 and LDs to ascertain the localization of TMEM-120 (Fig. 3C-D) and found that it co-  
164 localized extensively with the ER marker.

165         Next, we determined the localization of TMEM-120(G195E) by inserting the GFP  
166 coding sequence into the 5' end of *tmem-120(hj49)*. We found that GFP::TMEM-  
167 120(G195E) was expressed at a comparable level as the wild type protein and localized  
168 correctly to the ER (Fig. S3C). Therefore, we conclude that the G195E mutation most likely  
169 attenuates TMEM-120 function as predicted from the TMEM120A structure.

170         Finally, we experimentally verified the location of the N- and C-terminal tails of  
171 TMEM-120. To this end, we took advantage of the anti-GFP nanobody (vhhGFP4) directed  
172 protein degradation system (Wang et al., 2017). By expressing a GFP nanobody::ZIF-1  
173 fusion protein in the intestinal cytoplasm, GFP fusion proteins with the GFP moiety exposed  
174 in the cytoplasm are subject to degradation (Fig. 3E). However, if the GFP moiety is in the  
175 ER lumen, the fusion protein is protected. Indeed, we detected fluorescence signals from a  
176 luminal ER GFP marker (*hjSi528*), even when GFP nanobody::ZIF-1 was co-expressed in the  
177 same worm (Fig. 3F). In contrast, the two versions of GFP fusion protein with TMEM-120  
178 were subject to degradation, when GFP nanobody::ZIF-1 was co-expressed in the intestine  
179 (Fig. 3F). As a control, hypodermal GFP fusions with TMEM-120 remained detectable (Fig.  
180 3F), indicating that anti-GFP nanobody directed, post-translational degradation was tissue-  
181 restricted as designed. Taken together, our results firmly suggest that TMEM-120 is an ER  
182 resident protein, with its N- and C-termini facing the cytoplasm.

183

184

## 185 **TMEM-120 regulates LD expansion cell autonomously**

186 We generated an additional *tmem-120* deletion allele, *hj281*, using CRISPR mediated  
187 genome editing and Cre-LoxP mediated germline excision. Similar to the *hj50* allele, the  
188 *hj281* allele conferred *tmem-120* loss of function phenotypes and suppressed LD expansion in  
189 *daf-22* mutant worms (Fig. S3D-E). Re-expression of *tmem-120* in the intestine alone from a  
190 single-copy transgene (*hjSi557*) was sufficient to support LD expansion in *daf-22(-); tmem-*  
191 *120(hj281)* worms (Fig. S3D-E). Therefore, we conclude that TMEM-120 acts cell  
192 autonomously to promote LD expansion in *C. elegans*.

193

## 194 **TMEM120 promotes adipogenesis in mammalian cells**

195 The expression level of TMEM120A and TMEM120B is induced during the  
196 differentiation of 3T3-L1 pre-adipocytes into adipocytes (Batrakou et al., 2015). In addition,  
197 knockdown of TMEM120A and TMEM120B impedes the differentiation of 3T3-L1 pre-  
198 adipocytes (Batrakou et al., 2015). To extend these observations, we used an alternative  
199 model of adipogenesis: the murine OP9 pre-adipocytes (Wolins et al., 2006). In the presence  
200 of insulin and oleic acid, the OP9 pre-adipocytes could differentiate into adipocytes in 3 days,  
201 which was accompanied by the induction of adipocyte markers such as Glut4 and adiponectin  
202 (Fig. S4A-B). Over the same time course, the expression level of TMEM120A and  
203 TMEM120B was significantly increased (Fig. 4A-B). Next, we stably knocked down the  
204 expression of TMEM120A and/or TMEM120B in OP9 cells by CRISPRi (Gilbert et al.,  
205 2013) (Fig. S4C-D). Wild type and knockdown cells were induced to differentiate and mature  
206 adipocytes were recognized by the appearance of a single, dominant LD (>15 $\mu$ m), as  
207 visualized by Oil Red O staining (Fig. 4C-D). Consistent with previous observations in 3T3-  
208 L1 cells, knockdown of TMEM120A and/or TMEM120B significantly reduced the ability of

209 OP9 cells to differentiate into adipocytes (Fig. 4C-D). Our results suggest that the two  
210 mammalian TMEM120 paralogs are required for adipogenesis in vitro.

211

## 212 **TMEM120 promotes LD expansion in mammalian cells**

213         Next, we tested if TMEM120A was sufficient to promote LD expansion in  
214 mammalian COS7 cells. To this end, we generated COS7 cells that stably over-expressed  
215 TMEM120A using the Sleeping Beauty Transposon system (Kowarz et al., 2015). When  
216 oleic acid was added to induce LD expansion, we observed significantly larger LDs in cells  
217 that over-expressed TMEM120A in comparison to parental cells (Fig. 4E-F). Therefore,  
218 TMEM120A is sufficient to promote LD expansion, plausibly by elevating the amount of  
219 fatty acids that are available for the synthesis of TAG, which is stored in LDs. It should be  
220 noted that excess fatty acids that cannot be incorporated into TAG, are toxic to cells. As a  
221 result, cell death ensues (Listenberger et al., 2003). Accordingly, COS7 cells that over-  
222 expressed TMEM120A were more sensitive than parental cells to inhibitors of diacylglycerol  
223 O-acyltransferase 1 (DGAT1) in the presence of exogenous fatty acids (Fig. 4G-J, S4E-F).  
224 Almost all cells that over-expressed TMEM120A died when oleic or palmitic acid was  
225 applied simultaneously with the DGAT1 inhibitor A922500. Interestingly, the dose-sensitive  
226 response to DGAT1 inhibitors was not observed for a diacylglycerol O-acyltransferase 2  
227 (DGAT2) inhibitor (Fig. S4G). Based on the current model of LD biogenesis and expansion  
228 (Cao and Mak, 2020; Olzmann and Carvalho, 2019), DGAT1 in the ER acts early to  
229 synthesize TAG that supports the emergence of LDs from the ER while LD-localized  
230 DGAT2 contributes more significantly to the expansion of mature LDs. Our results on the  
231 differential sensitivity of TMEM120A over-expressing cells to DGAT1 inhibitors are

232 consistent with the notion that TMEM120A acts in the ER to promote the incorporation of  
233 fatty acids into TAG, upstream of DGAT1.

234

## 235 **Concluding remarks**

236 In this paper, we combined genetic, imaging and pharmacological approaches to  
237 demonstrate an evolutionarily conserved function of TMEM-120/TMEM120A in promoting  
238 TAG synthesis and LD expansion. Our examination of TMEM-120 at the endogenous level  
239 in live worms strongly suggests the ER as its primary site of action. This is consistent with  
240 the notion that the ensemble of TAG synthesis proteins can all be found in the ER, which  
241 conceivably enables the transfer of biosynthetic intermediates within the membrane.

242 Although we do not yet know if TMEM-120/TMEM120A acts specifically with one or more  
243 enzymes in the TAG synthesis pathway, the ability of purified TMEM120A to bind CoASH  
244 is intriguing (Niu et al., 2021; Rong et al., 2021; Xue et al., 2021). This is because fatty acids  
245 are converted to fatty acyl-CoA by acyl-CoA synthetases, prior to their addition to the  
246 glycerol backbone by a series of acyltransferases (Coleman and Lee, 2004; Yen et al., 2008).

247 We note that TMEM-120 mutant worms remain capable of TAG synthesis, albeit at a  
248 reduced level (Fig. 1E). It is plausible that TMEM-120/TMEM120A can trap CoASH or  
249 acyl-CoA in the ER to enhance the efficiency of TAG synthesis. Such hypothesis can be  
250 tested with purified proteins and substrates in vitro. In conclusion, our functional studies in *C.*  
251 *elegans* and mammalian cells support the conclusion from structural studies that TMEM120A  
252 and its orthologs are unlikely to be mechanosensory channels.

253 **Materials and Methods**

254 **Strains and transgenes**

255 The wide type *C. elegans* strain was Bristol N2. All experimental animals were maintained at  
256 20°C. The following strains and alleles were used: LG I, EG6701 (*ttTi4348*); LG II, *daf-22*  
257 (*ok693*); LG III, *tmem-120(h49)*, *tmem-120(hj50)*; LG IV, EG6703 (*cxTi10816*).

258 The following transgenes or CRISPR-generated alleles were used:

259 *hjSi158* [*vha-6p::sel-1(a.a.1-79)::mCherry::HDEL::let-858 3'UTR*] I

260 *hjSi524* [*vha-6p::vhhgfp4::zif-1::let-858 3'UTR*] I

261 *hjSi528* [*vha-6p::sel-1(a.a.1-79)::GFP::HDEL::tbb-2 3'UTR*] IV

262 *hjSi557* [*vha-6p::gfp::3xFLAG::tmem-120(codon modified) cDNA::dhs-28 3'-UTR*] IV

263 *dhs-3 (hj200)* [*dhs-3::mRuby*] I

264 *tmem-120 (hj239)* [*tmem-120(a.a.1-368)::gfp::3xFLAG::tmem-120(a.a.369 to stop)*] III

265 *tmem-120 (hj266)* [*tmem-120(a.a.1-368)(loxP in introns 3 and 4)::gfp::3xFLAG::tmem-*  
266 *120(a.a.369 to stop)*] III

267 *tmem-120 (hj270)* [*GFP::3xFLAG::tmem-120*] III

268 *tmem-120 (hj297)* [*GFP::3xFLAG::TMEM-120(G195E)*] III

269 The *tmem-120(hj281)* allele was generated by Cre-loxP mediated germline excision of *tmem-*  
270 *120(hj266)*.

271 Extrachromosomal array strains:

272 *hjEx29*[*vha-6p::tmem-120 cDNA::sl2::gfp::let-858 3' UTR*]

273 *hjEx30*[*vha-6p::mouse tmem120a cDNA::sl2::gfp::let-858 3'UTR*]

274 All strains were outcrossed with wild type N2 at least twice before further characterization.

275

276

277 **Genetic screen**

278 The *tmem-120* alleles were isolated in a genetic screen for suppressors of the expanded LD  
279 phenotype of *daf-22(ok693)* mutants. Complementation tests indicated that *hj49* and *hj50*  
280 belonged to the same complementation group. Using a SNP-based mapping strategy with the  
281 Hawaiian *C. elegans* isolate CB4856 (Davis et al., 2005), we mapped *hj50* to LGIII. Mutant  
282 worms were then subjected to whole genome sequencing (Illumina). The molecular lesions of  
283 *hj49* and *hj50* in M01G5.3 were confirmed by Sanger sequencing. The *daf-22(ok693); tmem-*  
284 *120(hj50)* mutant could be rescued by a *vha-6p::tmem-120::sl2::gfp* transgene (Fig. 1F).

285

286 **Fluorescence Imaging of *C. elegans* and mammalian cells**

287 Fluorescence imaging of live worms and mammalian cells was performed as described (Cao  
288 et al., 2019). In brief, fluorescence images of worms at indicated stages were acquired on a  
289 spinning disk confocal microscope (AxioObserver Z1, Carl Zeiss) equipped with a piezo Z  
290 stage using a 63x, NA 1.4 (for visualizing TMEM-120 localization) or 100x, NA 1.46 (for  
291 quantification of LD diameter) oil Alpha-Plan-Apochromat objective on a Neo sCMOS  
292 camera (Andor) controlled by the iQ3 software (Andor). For GFP, a 488nm laser was used  
293 for excitation and signals were collected with a 500-550nm emission filter. For mRuby or  
294 mCherry, a 561nm laser was used for excitation and signals were collected with a 580.5-  
295 653.5nm emission filter. For autofluorescence from lysosome-related organelles, a 488nm  
296 laser was used for excitation and signals were collected with a 580.5-653.5nm emission filter.  
297 For BFP, a 405 nm laser was used for excitation, and signals were collected with a 437nm  
298 emission filter. For FAS LD dye, a 405nm laser was used for excitation and signals were  
299 collected with a 617nm emission filter. Optical sections, as specified, were taken at 0.5 $\mu$ m

300 intervals and z stacks of 8 $\mu$ m-10 $\mu$ m were exported from iQ3 to Imaris 8 (Bitplane) for  
301 processing.

302

### 303 **Live imaging by Stimulated Raman Scattering**

304 Stimulated Raman Scattering (SRS) for measuring endogenous neutral lipid in live worms  
305 was carried out as described (Li et al., 2015). Live animals at specific stages were mounted  
306 on 8% agarose pad in 1xPBS buffer with 0.2mM levamisole. For visualizing LDs, the focal  
307 plane for the center of the first and second intestinal segments in young adult animals was  
308 determined with a 40x water immersion objective (UAPO40XW3/340, 1.15 NA, Olympus).  
309 To measure neutral lipid content level in whole worms, the focal plane with maximal SRS  
310 intensity was determined with a 20x air objective (Plan-Apochromat, 0.8 NA, Zeiss). The C-  
311 H bond was detected at 2863.5 cm<sup>-1</sup>. The quantification of SRS signal was done following a  
312 published protocol (Ramachandran et al., 2015). SRS of live worms for measuring fatty acid  
313 absorption and lipolysis were carried out as described with a 40x water immersion objective  
314 (UAPO40XW3/340, 1.15 NA, Olympus) (Li et al., 2019). Saturated bacterial cultures of  
315 OP50 were mixed with 4mM deuterium labeled PA-d<sub>31</sub> or OA-d<sub>34</sub> (Sigma) and then seeded  
316 onto NGM plates. To measure fatty acid uptake, populations of young adult worms (before  
317 egg-laying started), raised in the absence of deuterium labeled fatty acid were transferred to  
318 plates with PA-d<sub>31</sub> or OA-d<sub>34</sub>. To measure lipolysis, populations of L1 larvae were raised on  
319 plates with PA-d<sub>31</sub> or OA-d<sub>34</sub>, and transferred to OP50 seeded plates without deuterium  
320 labeled fatty acid when they were young adults. Animals were imaged by SRS at 5 to 6-hour  
321 intervals for 28 to 30 hours. The C-D bond vibration was detected at 2116.8 cm<sup>-1</sup>. Images  
322 were imported into ImageJ and further processed for quantification in MATLAB\_R2015a.

323

### 324 **Real-time PCR for *C. elegans* samples**

325 For each experimental sample, around 400 worms were synchronized at the L1 larval stage.  
326 Worms were harvested at the L4 stage (43 hours after L1 for WT, and 46 hours after L1 for  
327 *tmem-120(hj50)*), and total RNA extracted with a Direct-zol™ RNA MiniPrep kit (Zymo).  
328 200ng of total RNA was reverse transcribed with a Transcriptor cDNA synthesis kit (Roche).  
329 The real time PCR was carried out on a Roche LightCycler system with SYBR Green Master  
330 Mix (Roche). For each strain, technical triplicates were performed for each biological  
331 sample. The Delta-delta CT method was used for analyzing the raw CT values.

332 The following primers were used for RT-qPCR:

333 For *tmem-120*:

334 Forward: 5'-TGAGACAAGCCCAACAATCA-3'

335 Reverse: 5'-TGGAGCCCAAATCAAATTC-3'

336 For internal standard *rpl-32*:

337 Forward: 5'-AGGGAATTGATAACCGTGTCCGCA-3'

338 Reverse: 5'-TGTAGGACTGCATGAGGAGCATGT-3'

339

### 340 **Real-time PCR of mammalian samples**

341 Total RNA was extracted from mammalian cells using Direct-zol™ RNA MiniPrep kit  
342 (Zymo) following the manufacturer's protocol. 500ng of total RNA was reverse transcribed  
343 using First Strand cDNA Synthesis Kit (Sigma Aldrich) following the manufacturer's  
344 protocol. The real time PCR was performed on a LightCycler480 system (Roche) using  
345 SYBR Green Master Mix (Roche) following the manufacturer's protocol. Data was obtained  
346 with 3 biological samples of each cell line, tested in technical triplicates. The Delta-delta CT  
347 method was used for analyzing the raw CT values.



348 The following primers were used:

349 For TMEM120A:

350 Forward: 5'-AGGGCTTTCAGTCTTGGATG-3'

351 Reverse: 5'-AAATTGCCGAGGAAGAGGAG-3'

352 For TMEM120B:

353 Forward: 5'-TCAGAGCTGCGTTCAGTTTC-3'

354 Reverse: 5'-ACAGAAGAGGAAAGGCAGGAG-3'

355 For Glut4:

356 Forward: 5'-GTA ACTTCATTGTCGGCATGG-3'

357 Reverse: 5'-CTCTGGTTTCAGGCACTTTTAG-3'

358 For Adiponectin:

359 Forward: 5'-CCTGGCCACTTTCTCCTC-3'

360 Reverse: 5'-GTGGAGGGACCAAAGCAG-3'

361 For 36B4 (internal control) (Zhang et al., 2016):

362 Forward: 5'-CTGAGTGATGTGCAGCTGAT-3'

363 Reverse: 5'-AGAAGGGGGAGATGTTTCAG-3'

364

### 365 **Pharyngeal pumping rate**

366 Videos for pharyngeal pumping rate measurement were obtained on an OLYMPUS SZX16  
367 stereo microscope. One day before the imaging, L4 stage worms were transferred to a newly  
368 seeded NGM plate. The plates were left beside the microscope for acclimatization. For each  
369 experimental group, up to 10 worms were prepared. A 2-minute video focusing on the  
370 pharynx of each worm was captured. Each video was trimmed to a 60 seconds clip and then  
371 played under 0.3X speed for counting the number of pharyngeal contractions visually.

372

### 373 **Lipid analysis**

374 Lipid extraction was conducted using methyl-tert-butyl ether(MTBE) as described (Matyash  
375 et al., 2008; Witting et al., 2014), with modifications. For each experimental sample, around  
376 2,000 worms were synchronized at L1 larvae stage. Worms were harvested at the L4 stage  
377 (43 hours after L1 for WT, and 46 hours after L1 for *tmem-120(hj50)*), washed with detergent  
378 free PBS for at least three times and transferred into organic solvent resistant Eppendorf  
379 tubes. 250µl methanol (precooled to -20°C) (RDH, for HPLC) was added and samples were  
380 frozen in liquid nitrogen and stored at -80°C. For extraction, samples were thawed on ice, and  
381 875µl MTBE (VWR, for HPLC) was added. Worms were lysed with ice cold ultrasonic bath  
382 with an interval of 2 mins on and 30 seconds off. Phase separation was induced by the  
383 addition of 210µl water with further sonication for 15 mins. After centrifugation at 16,100xG  
384 at 4°C for 15 mins, the upper organic phase was collected into a glass vial. 325µl MTBE was  
385 added to the lower phase and centrifuged at 17,000xG at 4°C for 15 mins for re-extraction of  
386 lipids. Upper organic phase was collected after centrifugation and combined with those  
387 previously collected. Extracts were dried under a stream of nitrogen at room temperature, re-  
388 dissolved in 200µl acetonitrile (RCI Labscan, for HPLC)/ isopropanol (RNH)/ water(65/30/5,  
389 v/v/v) and stored at -80 °C.

390 Lipid analysis was performed as previously described (Zeng et al., 2020). A 100µl aliquot  
391 was analyzed using the Bruker Elute UPLC system with 2 technical injections per sample.  
392 The mass spectrometry data was analyzed with MetaboScape version 5.0, annotated with  
393 spectral libraries MSDIAL- Tandem Mass Spectral Atlas-VS68-pos and MSDIAL- Tandem  
394 Mass 736 Spectral Atlas-VS68-neg. The intensity was normalized with probabilistic quotient  
395 normalization method (Dieterle et al., 2006). Signals from all TAG species were summed.

396

397 **Cell culture**

398 OP9 mouse stromal cells (ATCC-CRL-2749) were maintained in  $\alpha$ -MEM (Life  
399 Technologies) with 20% FBS (Life Technologies) and 1% antibiotic-antimycotic (Life  
400 Technologies). COS7 Cells (ATCC-CRL-1651) were maintained in DMEM (Life  
401 Technologies) with 10% FBS (Life Technologies) and 1% antibiotic-antimycotic (Life  
402 Technologies). All the cell lines were incubated in 37°C humidified incubator with 5% CO<sub>2</sub>.

403

404 **Generation of TMEM120A overexpressing COS7 cells**

405 The Sleeping beauty transposon system was used to generate COS7 cells that overexpressed  
406 human TMEM120A. Cells were co-transfected with sleeping beauty transposon plasmid  
407 pSBi-Hyg-BFP (hTMEM120A cDNA) and sleeping beauty transposase plasmid pCMV  
408 (CAT) T7-SB100 with Lipofectamine2000 (Life Technologies). Three days after  
409 transfection, cells were maintained in selection medium (400 $\mu$ g/mL hygromycin in DMEM  
410 growth medium) for at least seven days. Cells that survived drug selection were sorted using  
411 Aria III system (Becton Dickinson) and sub-divided into ‘Low’, ‘Medium’, and ‘High’  
412 populations based on BFP fluorescence intensity (a surrogate of TMEM120A expression).  
413 The ‘High’ cell population was used in subsequent experiments.

414

415 **Generation of TMEM120A and TMEM120B knockdown OP9 cells**

416 OP9 cells were co-transfected with the sleeping beauty transposase plasmid pCMV (CAT)  
417 T7-SB100 and the transposon plasmid (Krab::dCas9::BFP::TMEM120A sgRNA or  
418 TMEM120B sgRNA). The sgRNA sequences were selected from a published database  
419 (Horlbeck et al., 2016). The transfected cells were maintained in selection medium  
420 (400 $\mu$ g/mL hygromycin in  $\alpha$ -MEM growth medium) for at least seven days. Cells that

421 survived drug selection were sorted into ‘Low’, ‘Medium’, and ‘High’ populations based on  
422 the BFP fluorescence intensity (a surrogate of dCas9 and sgRNA expression). The ‘Medium’  
423 cell populations were used for subsequent experiments.

424 For the TMEM120A+TMEM120B double knockdown cells, the sleeping beauty transposase  
425 plasmid and the transposon plasmid (mRuby::TMEM120B sgRNA) were transfected into  
426 TMEM120A knockdown cells. Drug selection and cell sorting were performed as described  
427 above except that puromycin was used instead of hygromycin. The ‘High’ cell population  
428 was used for subsequent experiments. The knockdown efficiency of all stable cell lines was  
429 determined by real time PCR.

430

### 431 **Fatty acid supplementation**

432 Fatty acids supplementation was performed according to a published method (Cao et al.,  
433 2019; Peng et al., 2011). In brief, the cell culture medium was pre-heated to 60°C for 5 mins  
434 prior to the addition of fatty acids (400µM oleic acid or palmitic acid). The medium was then  
435 equilibrated to 37°C before use. To induce LD expansion, cells were incubated with 400µM  
436 FAs for 20 hours. To visualize LDs, the cells were stained with 10µM FAS (Wang et al.,  
437 2016) for 15 mins prior to imaging.

438

### 439 **DGAT inhibitor and fatty acids treatment**

440 The cell culture medium was pre-heated to 60°C for 5 mins prior to the addition of fatty acids  
441 (400µM oleic acid or 400µM palmitic acid or ethanol control), without (DMSO control) or  
442 with DGAT inhibitors as specified (A922500, PF04620110 or PF06424439 (R&D system)).  
443 The medium was equilibrated to 37°C before use. The cells were treated with 20 hours (oleic

444 acid) or 60 hours (palmitic acid) before they were stained with crystal violet. Quantification  
445 of crystal violet was performed according to a published protocol (Feoktistova et al., 2016).

446 **Author Contributions**

447 Y.L. was responsible for Figs. 1, 2, 3, S1 (except S1F), S2 and S3. S.H. was responsible for  
448 Figs. 4 and S4. X.L. and J.Q. were responsible for developing the SRS system and Figs. 1A-  
449 B, 2 and S2. X.Y. was responsible for Fig. S1F and the generation of *tmem-120(hj266)*,  
450 *tmem-120(hj281)* and *hjSi557*. N.X. conducted genetic screen, genetic mapping and  
451 molecular cloning of *C. elegans* mutants. H.Y.M. supervised the project and wrote the paper.

452

453 **Acknowledgements**

454 We thank Yifei Qiu for preliminary data, Zhenfeng Liu for discussion, Pui Shuen Wong at  
455 the HKUST Bioscience Central Research Facility for lipidomic analysis, the Molecular  
456 Biology core at the Stowers Institute for Medical Research for whole-genome sequencing.  
457 Some strains were provided by the CGC, which is funded by NIH Office of Research  
458 Infrastructure Programs (P40 OD010440). This work was supported by RGC GRF 662013 to  
459 HYM.

460

461 **Competing interests**

462 The authors declare no competing interest.

463 **References**

- 464 Arribere JA, Bell RT, Fu BXH, Artiles KL, Hartman PS, Fire AZ. 2014. Efficient marker-  
465 free recovery of custom genetic modifications with CRISPR/Cas9 in *Caenorhabditis*  
466 *elegans*. *Genetics* **198**:837–846. doi:10.1534/genetics.114.169730
- 467 Batrakou DG, de Las Heras JI, Czapiewski R, Mouras R, Schirmer EC. 2015. TMEM120A  
468 and B: Nuclear Envelope Transmembrane Proteins Important for Adipocyte  
469 Differentiation. *PLoS One* **10**:e0127712. doi:10.1371/journal.pone.0127712
- 470 Beaulieu-Laroche L, Christin M, Donoghue A, Agosti F, Yousefpour N, Petitjean H,  
471 Davidova A, Stanton C, Khan U, Dietz C, Faure E, Fatima T, MacPherson A,  
472 Mouchbahani-Constance S, Bisson DG, Haglund L, Ouellet JA, Stone LS, Samson J,  
473 Smith M-J, Ask K, Ribeiro-da-Silva A, Blunck R, Poole K, Bourinet E, Sharif-Naeini  
474 R. 2020. TACAN Is an Ion Channel Involved in Sensing Mechanical Pain. *Cell*  
475 **180**:956–967.e17. doi:10.1016/j.cell.2020.01.033
- 476 Cao Z, Hao Y, Fung CW, Lee YY, Wang P, Li X, Xie K, Lam WJ, Qiu Y, Tang BZ, Shui G,  
477 Liu P, Qu J, Kang B-H, Mak HY. 2019. Dietary fatty acids promote lipid droplet  
478 diversity through seipin enrichment in an ER subdomain. *Nat Commun* **10**:2902.  
479 doi:10.1038/s41467-019-10835-4
- 480 Cao Z, Mak HY. 2020. Married at Birth: Regulation of Cellular Fat Metabolism by ER–Lipid  
481 Droplet Crosstalk. *Contact*. doi:10.1177/2515256420934671
- 482 Cho KF, Branon TC, Udeshi ND, Myers SA, Carr SA, Ting AY. 2020. Proximity labeling in  
483 mammalian cells with TurboID and split-TurboID. *Nat Protoc* **15**:3971–3999.  
484 doi:10.1038/s41596-020-0399-0
- 485 Coleman RA, Lee DP. 2004. Enzymes of triacylglycerol synthesis and their regulation. *Prog*  
486 *Lipid Res* **43**:134–176.
- 487 Czapiewski R, Batrakou DG, de las Heras JI, Carter RN, Sivakumar A, Sliwinska M, Dixon  
488 CR, Webb S, Lattanzi G, Morton NM, Schirmer EC. 2021. Genomic loci  
489 mispositioning in *Tmem120a* knockout mice yields latent lipodystrophy.  
490 *bioRxiv* 2021.04.12.439495. doi:10.1101/2021.04.12.439495
- 491 Davis MW, Hammarlund M, Harrach T, Hullett P, Olsen S, Jorgensen EM. 2005. Rapid  
492 single nucleotide polymorphism mapping in *C. elegans*. *BMC Genomics* **6**:118.  
493 doi:10.1186/1471-2164-6-118
- 494 Dieterle F, Ross A, Schlotterbeck G, Senn H. 2006. Probabilistic quotient normalization as  
495 robust method to account for dilution of complex biological mixtures. Application in  
496 1H NMR metabolomics. *Anal Chem* **78**:4281–4290. doi:10.1021/ac051632c
- 497 Feoktistova M, Geserick P, Leverkus M. 2016. Crystal Violet Assay for Determining  
498 Viability of Cultured Cells. *Cold Spring Harb Protoc* **2016**:pdb.prot087379.  
499 doi:10.1101/pdb.prot087379
- 500 Fu D, Yu Y, Folick A, Currie E, Farese RV, Tsai T-H, Xie XS, Wang MC. 2014. In vivo  
501 metabolic fingerprinting of neutral lipids with hyperspectral stimulated Raman  
502 scattering microscopy. *J Am Chem Soc* **136**:8820–8828. doi:10.1021/ja504199s
- 503 Gilbert LA, Larson MH, Morsut L, Liu Z, Brar GA, Torres SE, Stern-Ginossar N, Brandman  
504 O, Whitehead EH, Doudna JA, Lim WA, Weissman JS, Qi LS. 2013. CRISPR-  
505 mediated modular RNA-guided regulation of transcription in eukaryotes. *Cell*  
506 **154**:442–451. doi:10.1016/j.cell.2013.06.044
- 507 Henne WM, Reese ML, Goodman JM. 2018. The assembly of lipid droplets and their roles in  
508 challenged cells. *EMBO J* **37**:e98947. doi:10.15252/embj.201898947
- 509 Horlbeck MA, Gilbert LA, Villalta JE, Adamson B, Pak RA, Chen Y, Fields AP, Park CY,  
510 Corn JE, Kampmann M, Weissman JS. 2016. Compact and highly active next-

- 511 generation libraries for CRISPR-mediated gene repression and activation. *eLife* **5**.  
512 doi:10.7554/eLife.19760
- 513 Jackson MR, Nilsson T, Peterson PA. 1990. Identification of a consensus motif for retention  
514 of transmembrane proteins in the endoplasmic reticulum. *EMBO J* **9**:3153–3162.
- 515 Ke M, Yu Y, Zhao C, Lai S, Su Q, Yuan W, Yang L, Deng D, Wu K, Zeng W, Geng J, Wu J,  
516 Yan Z. 2021. Cryo-EM structures of human TMEM120A and TMEM120B. *bioRxiv*  
517 2021.06.27.450060. doi:10.1101/2021.06.27.450060
- 518 Kowarz E, Löscher D, Marschalek R. 2015. Optimized Sleeping Beauty transposons rapidly  
519 generate stable transgenic cell lines. *Biotechnol J* **10**:647–653.  
520 doi:10.1002/biot.201400821
- 521 Li X, Lam WJ, Cao Z, Hao Y, Sun Q, He S, Mak HY, Qu JY. 2015. Integrated femtosecond  
522 stimulated Raman scattering and two-photon fluorescence imaging of subcellular lipid  
523 and vesicular structures. *J Biomed Opt* **20**:110501. doi:10.1117/1.JBO.20.11.110501
- 524 Li X, Li Y, Jiang M, Wu W, He S, Chen C, Qin Z, Tang BZ, Mak HY, Qu JY. 2019.  
525 Quantitative Imaging of Lipid Synthesis and Lipolysis Dynamics in *Caenorhabditis*  
526 *elegans* by Stimulated Raman Scattering Microscopy. *Anal Chem* **91**:2279–2287.  
527 doi:10.1021/acs.analchem.8b04875
- 528 Listenberger LL, Han X, Lewis SE, Cases S, Farese RV, Ory DS, Schaffer JE. 2003.  
529 Triglyceride accumulation protects against fatty acid-induced lipotoxicity. *Proc Natl*  
530 *Acad Sci U S A* **100**:3077–3082. doi:10.1073/pnas.0630588100
- 531 Ma W, Goldberg J. 2013. Rules for the recognition of dilysine retrieval motifs by coatomer.  
532 *EMBO J* **32**:926–937. doi:10.1038/emboj.2013.41
- 533 Matyash V, Liebisch G, Kurzchalia TV, Shevchenko A, Schwudke D. 2008. Lipid extraction  
534 by methyl-tert-butyl ether for high-throughput lipidomics. *J Lipid Res* **49**:1137–1146.  
535 doi:10.1194/jlr.D700041-JLR200
- 536 Niu Y, Tao X, Vaisey G, Olinares PDB, Alwaseem H, Chait BT, MacKinnon R. 2021.  
537 Analysis of the Mechanosensor Channel Functionality of TACAN. *bioRxiv*  
538 2021.06.11.448078. doi:10.1101/2021.06.11.448078
- 539 Olzmann JA, Carvalho P. 2019. Dynamics and functions of lipid droplets. *Nat Rev Mol Cell*  
540 *Biol* **20**:137–155. doi:10.1038/s41580-018-0085-z
- 541 Peng G, Li L, Liu Y, Pu J, Zhang S, Yu J, Zhao J, Liu P. 2011. Oleate blocks palmitate-  
542 induced abnormal lipid distribution, endoplasmic reticulum expansion and stress, and  
543 insulin resistance in skeletal muscle. *Endocrinology* **152**:2206–2218.  
544 doi:10.1210/en.2010-1369
- 545 Ramachandran PV, Mutlu AS, Wang MC. 2015. Label-free biomedical imaging of lipids by  
546 stimulated Raman scattering microscopy. *Curr Protoc Mol Biol* **109**:30.3.1–17.  
547 doi:10.1002/0471142727.mb3003s109
- 548 Rong Y, Jiang J, Gao Y, Guo J, Song D, Liu W, Zhao Y, Xiao B, Liu Z. 2021. TMEM120A  
549 contains a specific coenzyme A-binding site and might not mediate poking- or stretch-  
550 induced channel activities in cells. *bioRxiv* 2021.06.17.448797.  
551 doi:10.1101/2021.06.17.448797
- 552 Schirmer EC, Florens L, Guan T, Yates JR, Gerace L. 2003. Nuclear membrane proteins with  
553 potential disease links found by subtractive proteomics. *Science* **301**:1380–1382.  
554 doi:10.1126/science.1088176
- 555 Schuldiner M, Bohnert M. 2017. A different kind of love - lipid droplet contact sites. *Biochim*  
556 *Biophys Acta* **1862**:1188–1196. doi:10.1016/j.bbailip.2017.06.005
- 557 Thiam AR, Ikonen E. 2021. Lipid Droplet Nucleation. *Trends Cell Biol* **31**:108–118.  
558 doi:10.1016/j.tcb.2020.11.006



- 559 Tsirigos KD, Peters C, Shu N, Käll L, Elofsson A. 2015. The TOPCONS web server for  
560 consensus prediction of membrane protein topology and signal peptides. *Nucleic*  
561 *Acids Res* **43**:W401-407. doi:10.1093/nar/gkv485
- 562 Walther TC, Chung J, Farese RV. 2017. Lipid Droplet Biogenesis. *Annu Rev Cell Dev Biol*  
563 **33**:491–510. doi:10.1146/annurev-cellbio-100616-060608
- 564 Wang MC, Min W, Freudiger CW, Ruvkun G, Xie XS. 2011. RNAi screening for fat  
565 regulatory genes with SRS microscopy. *Nat Methods* **8**:135–138.  
566 doi:10.1038/nmeth.1556
- 567 Wang S, Tang NH, Lara-Gonzalez P, Zhao Z, Cheerambathur DK, Prevo B, Chisholm AD,  
568 Desai A, Oegema K. 2017. A toolkit for GFP-mediated tissue-specific protein  
569 degradation in *C. elegans*. *Dev Camb Engl* **144**:2694–2701. doi:10.1242/dev.150094
- 570 Wang Z, Gui C, Zhao E, Wang J, Li X, Qin A, Zhao Z, Yu Z, Tang BZ. 2016. Specific  
571 Fluorescence Probes for Lipid Droplets Based on Simple AIEgens. *ACS Appl Mater*  
572 *Interfaces* **8**:10193–10200. doi:10.1021/acsami.6b01282
- 573 Witting M, Maier TV, Garvis S, Schmitt-Kopplin P. 2014. Optimizing a ultrahigh pressure  
574 liquid chromatography-time of flight-mass spectrometry approach using a novel sub-  
575 2µm core-shell particle for in depth lipidomic profiling of *Caenorhabditis elegans*. *J*  
576 *Chromatogr A* **1359**:91–99. doi:10.1016/j.chroma.2014.07.021
- 577 Wolins NE, Quaynor BK, Skinner JR, Tzekov A, Park C, Choi K, Bickel PE. 2006. OP9  
578 mouse stromal cells rapidly differentiate into adipocytes: characterization of a useful  
579 new model of adipogenesis. *J Lipid Res* **47**:450–460. doi:10.1194/jlr.D500037-  
580 JLR200
- 581 Xu N, Zhang SO, Cole RA, McKinney SA, Guo F, Haas JT, Bobba S, Farese RV Jr, Mak  
582 HY. 2012. The FATP1-DGAT2 complex facilitates lipid droplet expansion at the ER-  
583 lipid droplet interface. *J Cell Biol* **198**:895–911. doi:10.1083/jcb.201201139
- 584 Xue J, Han Y, Baniyadi H, Zeng W, Pei J, Grishin N, Wang J, Tu BP, Jiang Y. 2021.  
585 TMEM120 is a coenzyme A-binding membrane protein with structural similarities to  
586 ELOVL fatty acid elongase. *bioRxiv* 2021.06.13.448233.  
587 doi:10.1101/2021.06.13.448233
- 588 Yen C-LE, Stone SJ, Koliwad S, Harris C, Farese RV Jr. 2008. Thematic review series:  
589 glycerolipids. DGAT enzymes and triacylglycerol biosynthesis. *J Lipid Res* **49**:2283–  
590 2301. doi:10.1194/jlr.R800018-JLR200
- 591 Zeng L, Li X, Preusch CB, He GJ, Xu N, Cheung TH, Qu J, Mak HY. 2020. Nuclear receptor  
592 NHR-49 promotes peroxisome proliferation to compensate for aldehyde  
593 dehydrogenase deficiency in *C. elegans*. *bioRxiv* 2020.12.04.411637.  
594 doi:10.1101/2020.12.04.411637
- 595 Zhang SO, Box AC, Xu N, Le Men J, Yu J, Guo F, Trimble R, Mak HY. 2010. Genetic and  
596 dietary regulation of lipid droplet expansion in *Caenorhabditis elegans*. *Proc Natl*  
597 *Acad Sci U S A* **107**:4640–4645. doi:10.1073/pnas.0912308107
- 598 Zhang W-X, Fan J, Ma J, Rao Y-S, Zhang L, Yan Y-E. 2016. Selection of Suitable Reference  
599 Genes for Quantitative Real-Time PCR Normalization in Three Types of Rat Adipose  
600 Tissue. *Int J Mol Sci* **17**:E968. doi:10.3390/ijms17060968  
601

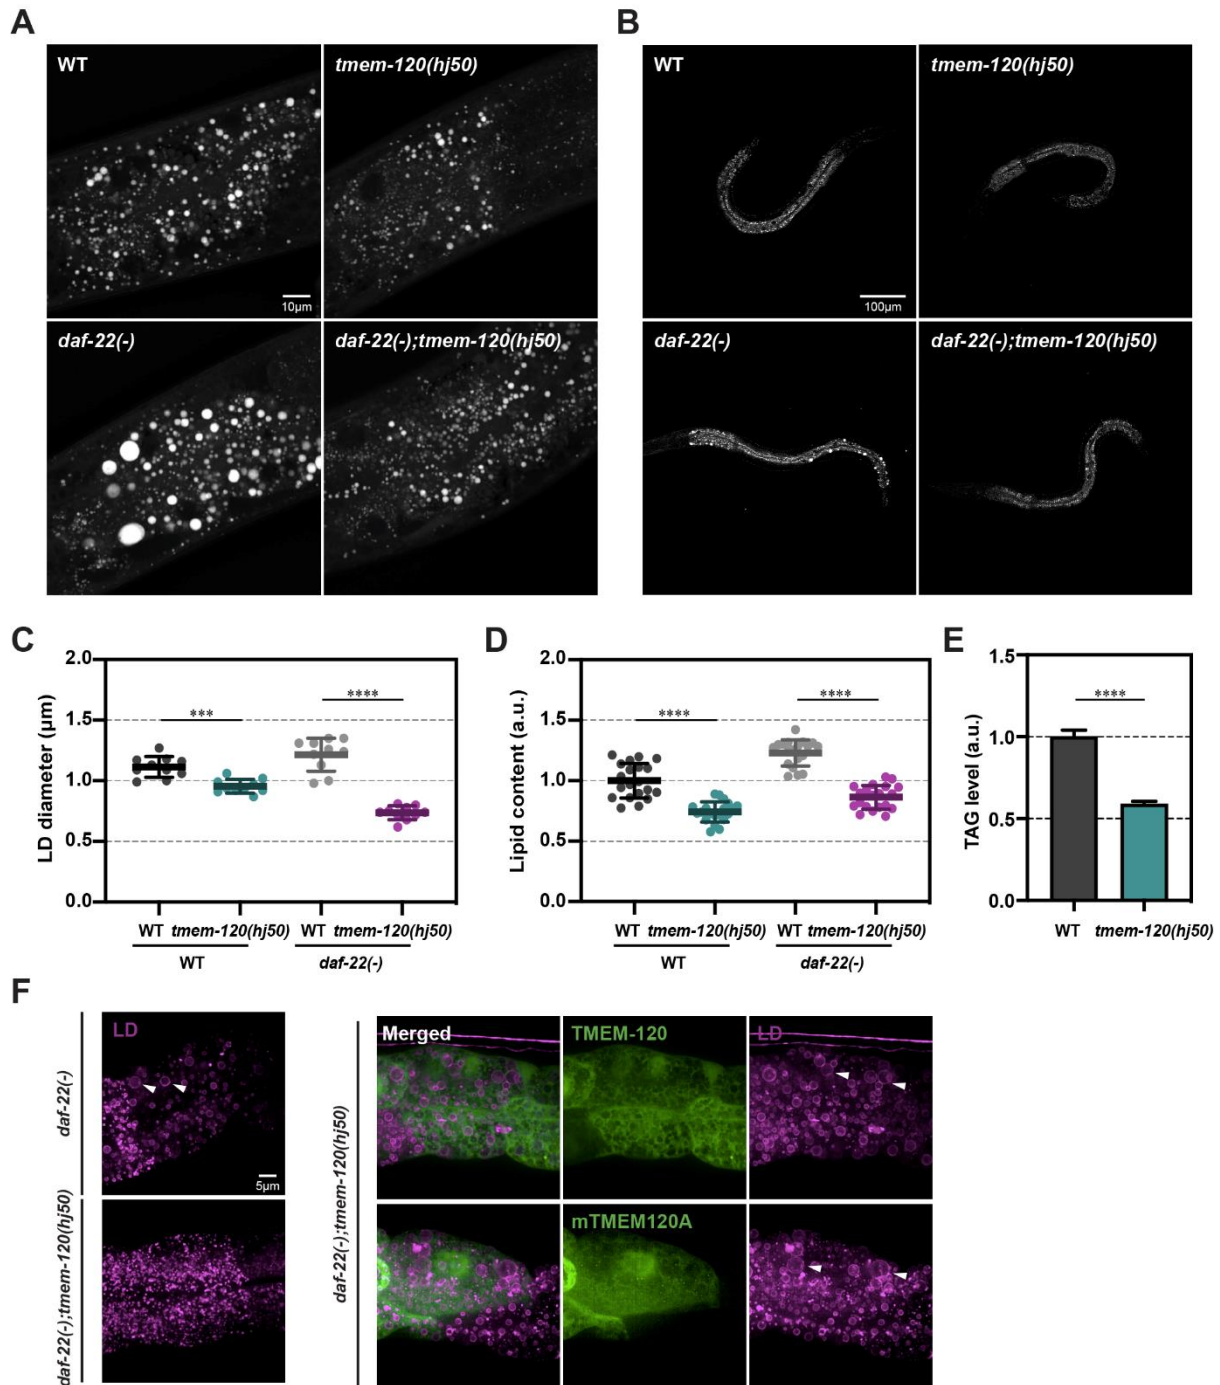

602

603 **Figure 1. TMEM-120 promotes TAG synthesis and LD expansion.** (A) Visualization of  
 604 LDs in wild type (WT), *tmem-120(hj50)*, *daf-22(ok693)* and *daf-22(ok693); tmem-120(hj50)*  
 605 young adult animals by Stimulated Raman Scattering (SRS). Representative images of a  
 606 single focal plane of the first and second intestinal segments are shown. The anterior end of  
 607 the worm is toward the left. For simplicity, *daf-22(ok693)* will be referred to as *daf-22(-)*  
 608 thereafter. (B) As in (A), but with representative images of entire larval stage L4 worms at a  
 609 focal plane with the strongest SRS intensity. (C) Quantification of LD diameter of WT,

610 *tmem-120(hj50)*, *daf-22(-)* and *daf-22(-); tmem-120(hj50)* larval L4 stage worms (n = 10 for  
611 each strain), using DHS-3::mRuby (*hj200*) as a LD marker. Each data point represents the  
612 average LD diameter of an individual worm. Total number of LDs quantified: WT = 2033,  
613 *tmem-120(hj50)* = 1561, *daf-22(-)* = 1331 and *tmem-120(hj50); daf-22(-)* = 1337. (D) Label  
614 free quantification of neutral lipid content by SRS in WT (n=20), *tmem-120(hj50)* (n=20),  
615 *daf-22(-)* (n=19) and *daf-22(-); tmem-120(hj50)* (n=20) worm shown in (B). Each data point  
616 represents neutral lipid content of an individual worm. The mean value of WT worms is  
617 assigned as 1. a.u. = arbitrary unit. (E) Quantification of TAG level in WT and *tmem-*  
618 *120(hj50)* L4 stage animals by LC-MS. Three independent biological samples for each group.  
619 Each group consists of ~2000 worms. The mean value of WT worms is assigned as 1. (F)  
620 Visualization of LDs in L4 stage worms using DHS-3::mRuby (*hj200*) as a LD marker.  
621 Representative images of *daf-22(-)*, *daf-22(-); tmem-120(hj50)*, *daf-22(-); tmem-120(hj50);*  
622 *Ex[vha-6p::tmem-120::sl2::gfp]* and *daf-22(-); tmem-120(hj50); Ex[vha-6p::mouse*  
623 *tmem120A::sl2::gfp]* are shown. The GFP is expressed from the same operon as TMEM-120  
624 or mouse TMEM120A, but not as a fusion protein. Each representative image is a projection  
625 of 7.5 $\mu$ m z stack with the second intestinal segment in the center area. Enlarged LDs are  
626 indicated by white arrowheads. For all graphs, bars or horizontal lines represent mean  $\pm$  SD.  
627 Statistical analysis: (C-D) two-way ANOVA followed by Sidak's multiple comparisons test;  
628 (E) unpaired t test. \*\*\*p < 0.001; \*\*\*\*p < 0.0001.

629

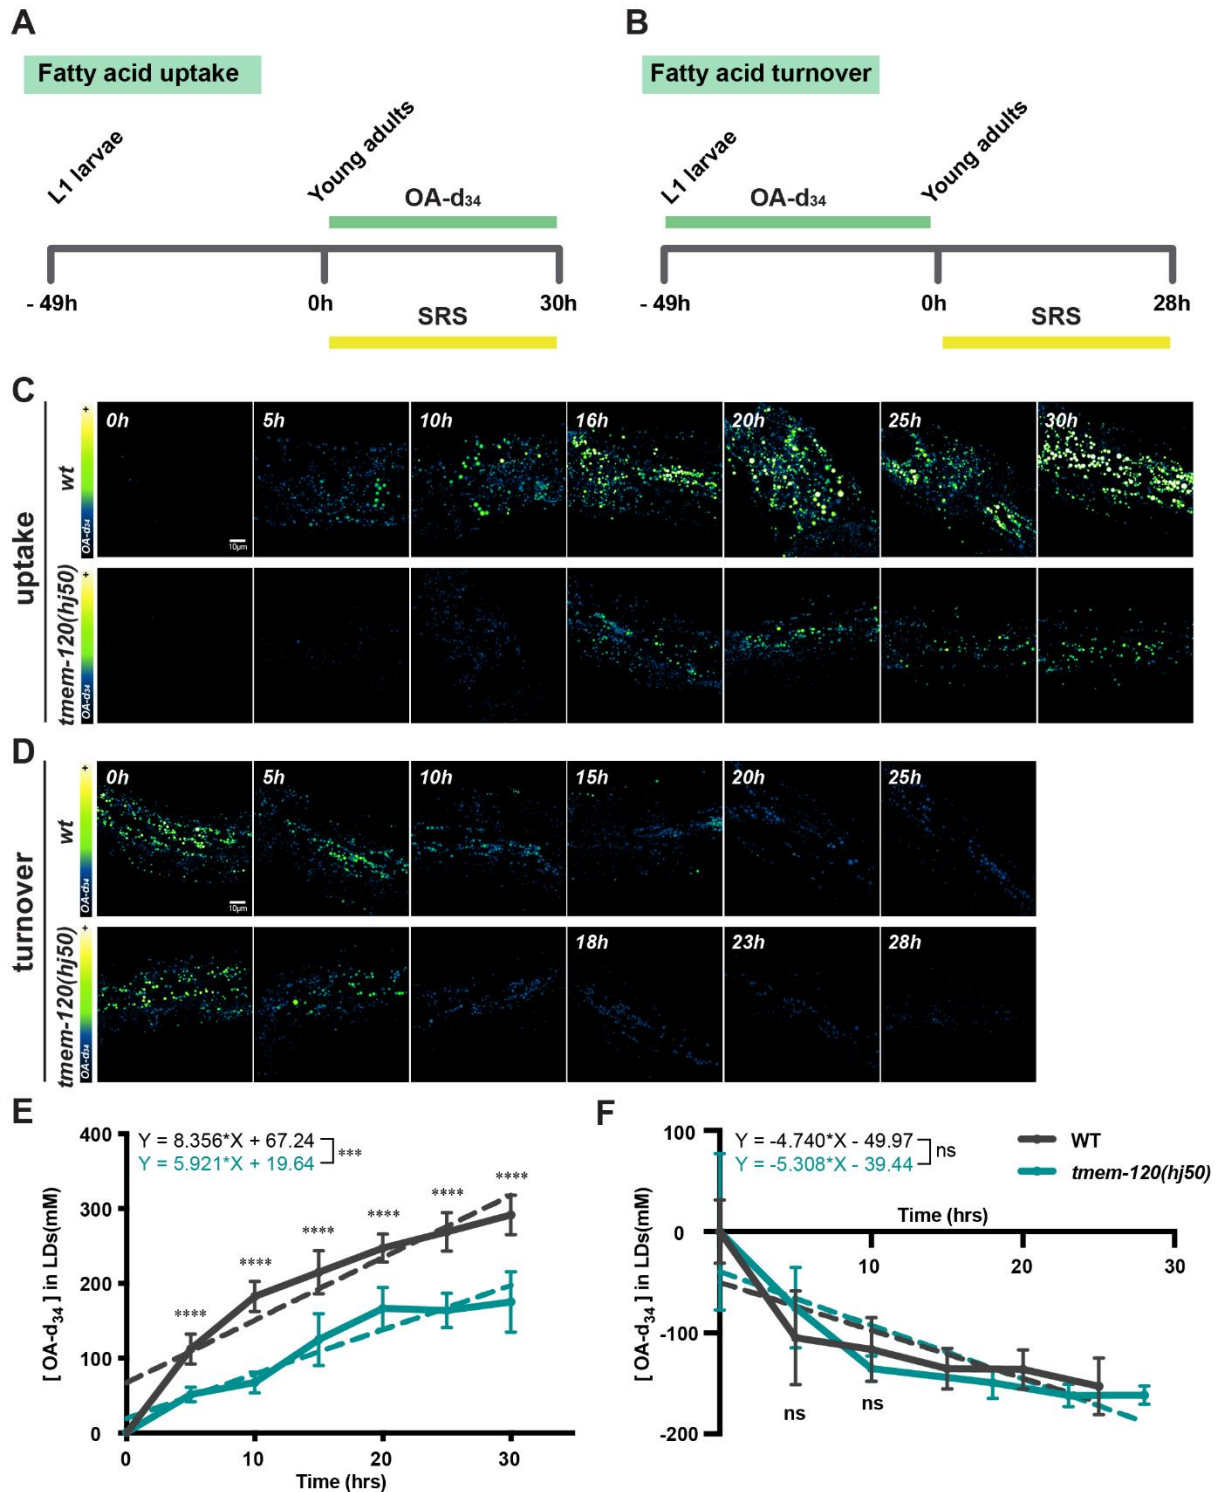

630

631 **Figure 2. TMEM-120 promotes the incorporation of fatty acids into TAG.** (A-B) The  
 632 experimental design for monitoring deuterated oleic acid-d<sub>34</sub> (OA-d<sub>34</sub>) uptake (A) or turnover  
 633 (B). (C-D) Visualization of OA-d<sub>34</sub> incorporation (C) or turnover (D) by SRS in wild type  
 634 (wt) and *tmem-120(hj50)* worms. Representative images of a layer with the strongest SRS  
 635 signal in the first and second intestinal segments are shown. (E) Quantification of OA-d<sub>34</sub>

636 uptake in WT and *tmem-120(hj50)* worms shown in (C). n = 5 to 9 for each group at each  
637 time point. Straight dashed lines and equations were generated based on linear regression  
638 analysis of each group. (F) Quantification of OA-d<sub>34</sub> turnover in WT and *tmem-120(hj50)*  
639 worms shown in (D). n = 7 to 10 for each group at each time point. Statistical analysis:  
640 unpaired t test (for each time point). ns, not significant; \*\*\*p < 0.001.

641

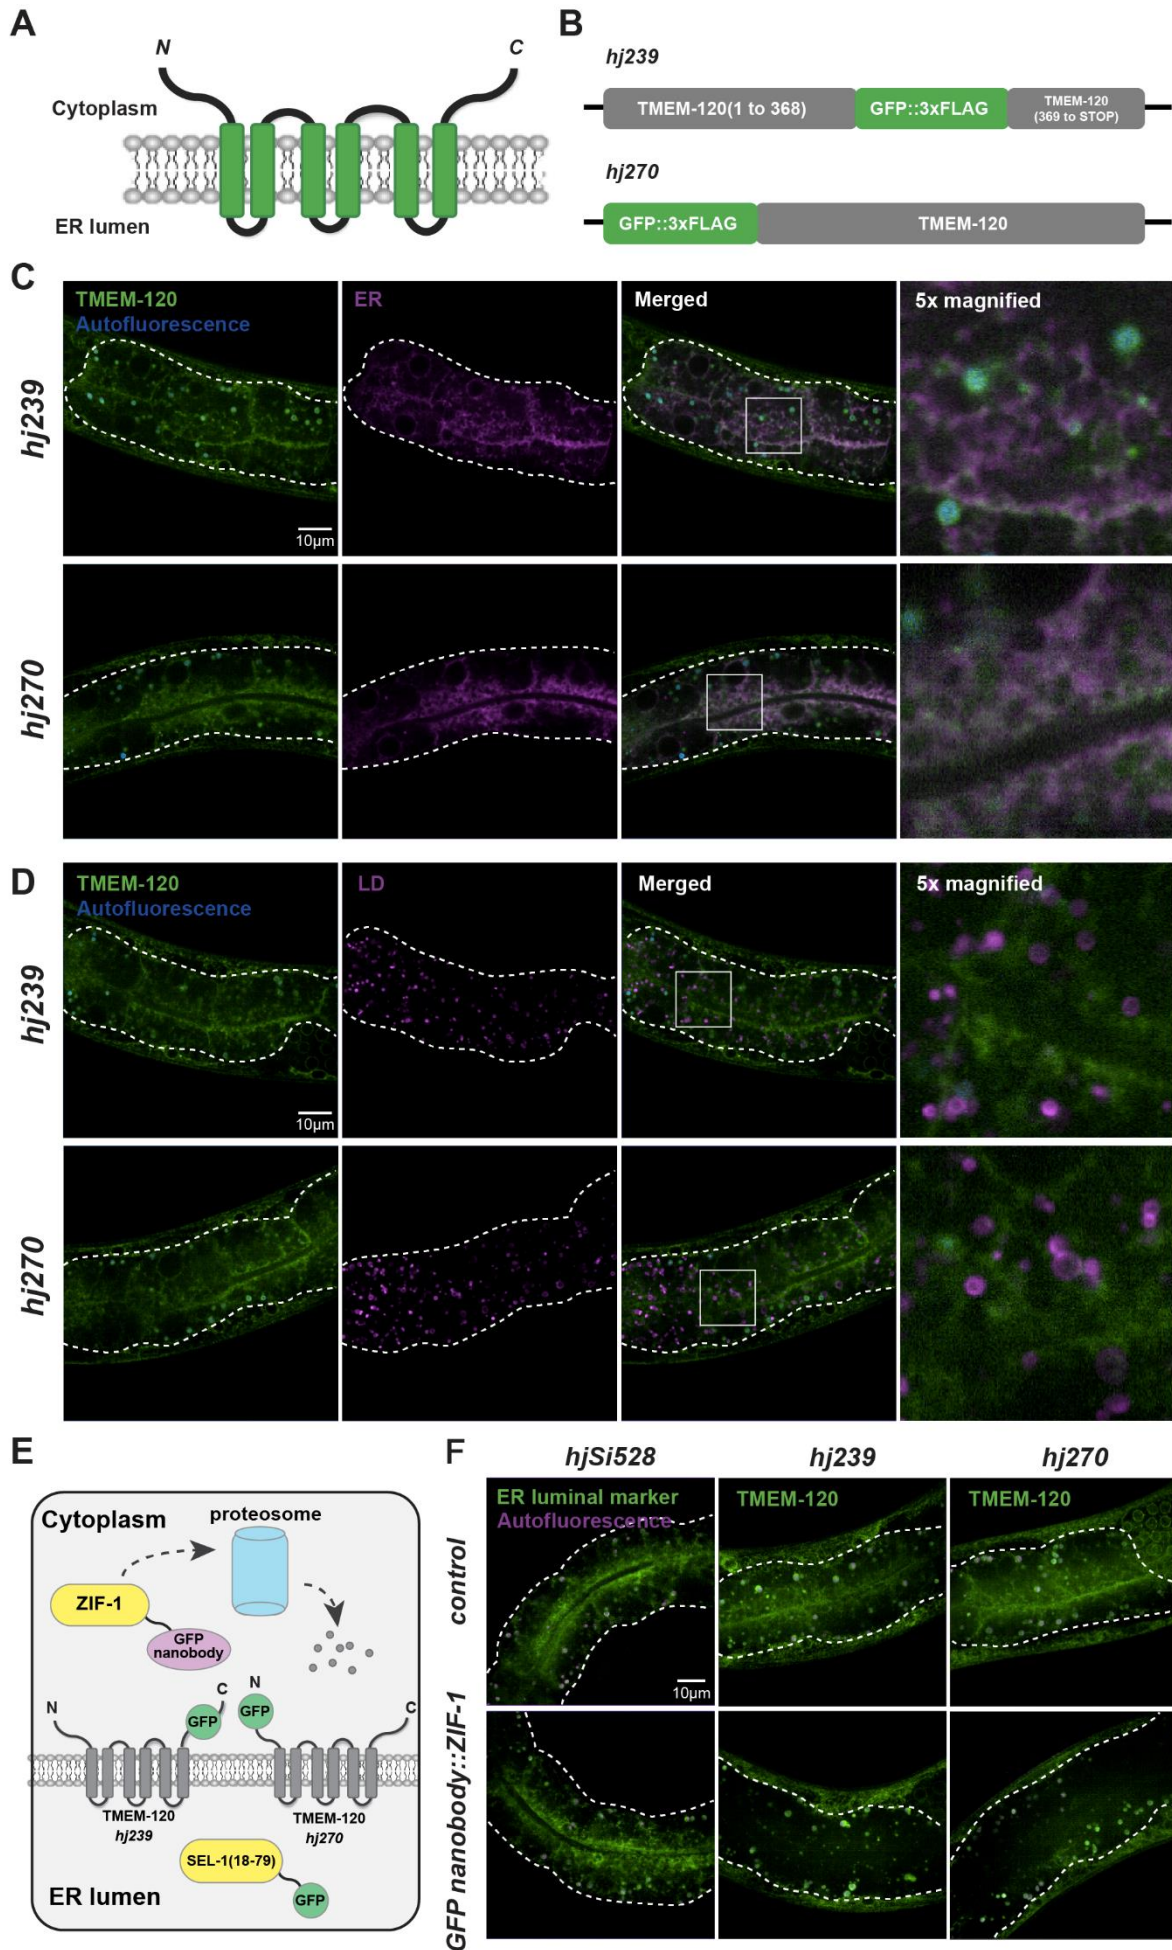

643 **Figure 3. TMEM-120 is an ER resident protein.** (A) The topology of TMEM-120 based on  
644 its homology with TMEM120A. (B) Schematic representation of TMEM-120 GFP fusion  
645 proteins. (C) Visualization of TMEM-120 GFP fusion proteins and an intestinal-specific  
646 luminal ER marker SEL-1(18-79)::mCherry::HDEL (*hjSi158*) in L4 worms. Representative  
647 images of a single focal plane of the first and second intestinal segment are shown. For each  
648 image, the intestine is enclosed by dashed lines. The boxed region in the merged image is 5x  
649 magnified and shown as a separate panel. (D) As in (C), but with an LD marker DHS-  
650 3::mRuby (*hj200*). (E) Schematic diagram on the GFP nanobody::ZIF-1 mediated  
651 degradation of cytoplasmic GFP fusion proteins. GFP targeted to the ER lumen is protected  
652 from degradation. (F) Visualization of an intestinal-specific luminal ER marker SEL-1(18-  
653 79)::GFP::HDEL (*hjSi528*) and TMEM-120 GFP fusion proteins in L4 worms in the absence  
654 (control) or presence of GFP nanobody::ZIF-1 (*hjSi524*). Each representative image is a  
655 projection of 5 $\mu$ m z stack with the second intestinal segment in the center. The intestine is  
656 enclosed by dashed lines. GFP signals in the hypodermis (regions outside the dashed lines)  
657 were unaffected by GFP nanobody::ZIF-1.

658

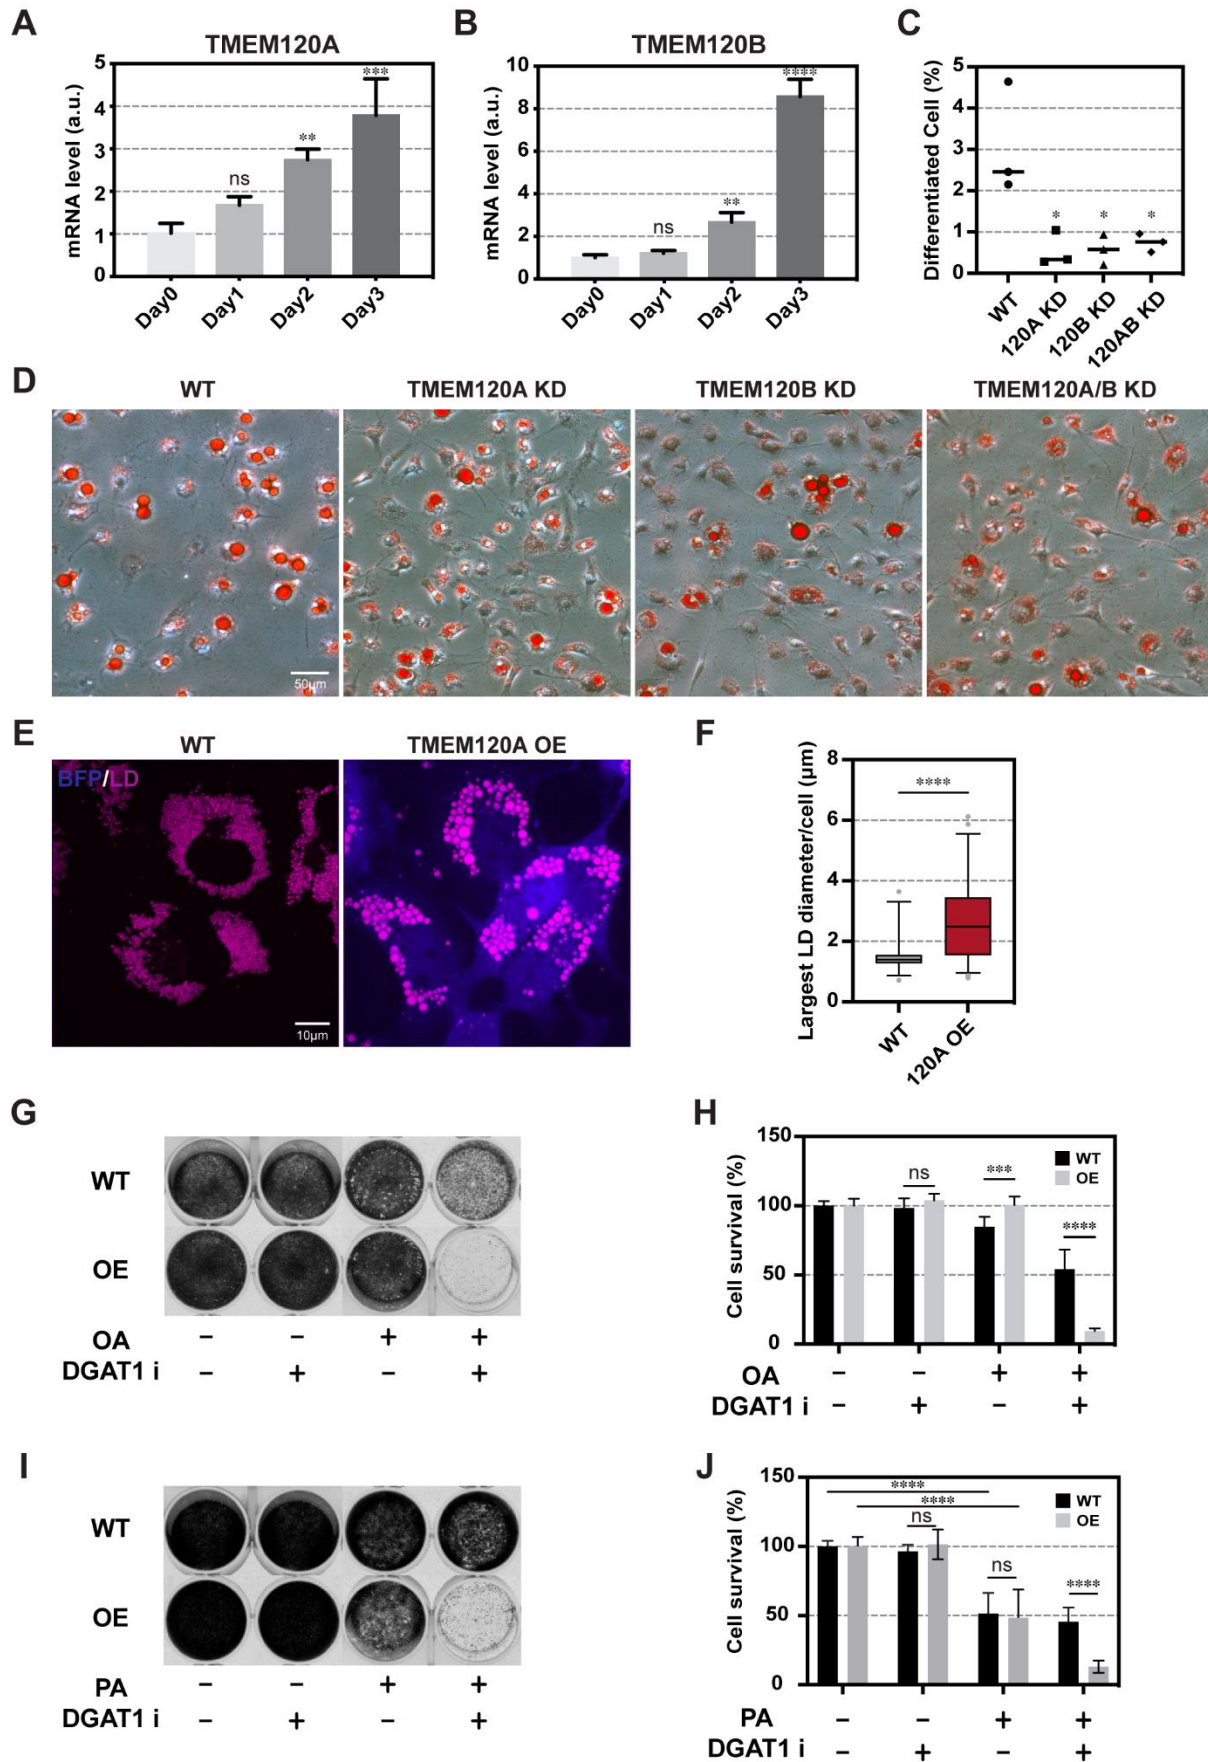



660 **Figure 4. TMEM120A promotes adipogenesis and LD expansion in mammalian cells.**

661 (A-B) The expression level of TMEM120A and TMEM120B during OP9 pre-adipocyte  
662 differentiation measured by real time PCR. Mean + SD from three independent samples is  
663 shown. (C) Quantification of mature OP9 adipocytes (at least one LD >15 $\mu$ m / cell). Data  
664 summarized from three independent experiments. Each data point represents the percentage  
665 of mature adipocytes in one experiment. Total number of cells analyzed: WT, 4988 cells;  
666 TMEM120A KD, 5216 cells; TMEM120B KD, 6107 cells; TMEM120A+TMEM120B KD:  
667 3898 cells. Horizontal line represents the mean. (D) Visualization of LDs in differentiated  
668 WT, TMEM120A KD, TMEM120B KD, and TMEM120A/B KD OP9 cells by Oil Red O  
669 staining. (E) Visualization of LDs in oleic acid treated wild type (WT) and TMEM120A  
670 overexpressing (OE) COS7 cells with FAS lipid droplet dye. Three independent experiments  
671 were performed. Each representative image is a projection of 5.5 $\mu$ m (WT) or 6.5 $\mu$ m (OE) z  
672 stack. (F) Quantification of the largest LD diameter of oleic acid treated WT and  
673 TMEM120A OE COS7 cells. Three independent experiments were performed. Total number  
674 of cells analyzed: WT: 183 cells. OE: 239 cells. (G) Assessment of cell survival by crystal  
675 violet staining after 20 hours of oleic acid (OA) and DGAT1 inhibitor (DGAT1i, A922500)  
676 treatment. Solvent control: ethanol (oleic acid) and DMSO (DGAT1i). (H) Quantification of  
677 cell survival, based on extracted crystal violet from (G). Data summarized from 9  
678 independent wells, performed on 3 separate days, for each cell line. Mean + SD is shown. (I)  
679 As in (G), but with palmitic acid (PA). (J), As in (H), but with cells treated with palmitic acid  
680 (PA). Statistical analysis: (A-B) One-way ANOVA followed by Dunnett's multiple  
681 comparisons test; (C and F) unpaired t test; (H-J) multiple t-test. ns, not significant; \*p<0.05;  
682 \*\*p<0.01; \*\*\*p<0.001; \*\*\*\*p<0.0001.

**A**

```

C. elegans 1 - - - - -MATEKLDSEWKLVQDDFQKLEKIHDEYIQKSRQVSKFQETAGKAMKHNYLLKNLKETMRAQAQSAEKLDDEADTSKTDVLSHVAKLREEL 90
Mouse 1 MQSPPPDPLGDCLRNWEDLQDDFQGIQETHRLYRLKLEELTKLQANCTNSITRQKKRLQELALVLKCKRPSL - - - - -P - - - - -SESMEAAQEL ENQM 87
Human 1 MQPPPPGPLGDCLRDWEDLQDDFQNIQETHRLYRLKLEELTKLQNNCTSSITRQKKRLQELALALKCKKPSL - - - - -P - - - - -AEAEAAQEL ENQM 87

C. elegans 91 AVANLRIRDMQGE LPAQTNGFYLNLI LGSNLNVSLLTKAEKFKYKQEYEGFKWSITILIC-LLALCAWIWPFVFDISLCFLMVWYCTLTIRESV 185
Mouse 88 KERQGLFFDMEAYL - PKKNGLYLSLVLG - NVNVTL LLSKQAKFAYKDEYEFKLYLTIILIVISFTQRFLNLSRVTDAAFNFLVWYCTLTIRESI 181
Human 88 KERQGLFFDMEAYL - PKKNGLYLSLVLG - NVNVTL LLSKQAKFAYKDEYEFKLYLTIILIVISFTQRFLNLSRVTDAAFNFLVWYCTLTIRESI 181

          hj49(G195E)

C. elegans 186 LRVNGSKIKGWWLSHHYLSCAVPGIVLTWKDGLCYQEFRPYFLIFTFYISLVQLAQNYQSGCLRRHS LGQGHQMDITVEGFTSWQFKGLTFLLP 281
Mouse 182 LIINNGSRIKGWWVFHHYVSTFLSGVMLTWPDGLMYQKFRNQFLSFSMYQSFVQFLQYYYQSGCLYRLRALGERHTMDLTVEGFQSWMWRGLTFLLP 277
Human 182 LIINNGSRIKGWWVFHHYVSTFLSGVMLTWPDGLMYQKFRNQFLSFSMYQSFVQFLQYYYQSGCLYRLRALGERHTMDLTVEGFQSWMWRGLTFLLP 277

          hj50(Q290*)

C. elegans 282 FLA FGYLYQLYLAWK LFGYTNSETCDGIWQVWTL SLL LGLIAGNIVT TSMVCIRKFKTSTSYTNI VTLTRKYSSRRNIREAPPTPELLRGAPPPP 377
Mouse 278 FLFFGHFWQLFNALTLFNLRADPECKE - WQVLMCGFPFLLLFLGNFFTL LRVVHQK FHSQHQGNKKD - - - - - 343
Human 278 FLFFGHFWQLFNALTLFNLRADPECKE - WQVLMCGFPFLLLFLGNFFTL LRVVHHK FHSQRHGSKKD - - - - - 343

C. elegans 378 TGKLHLH
Mouse
Human
    
```

**B**

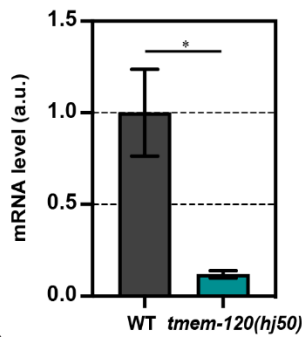

**C**

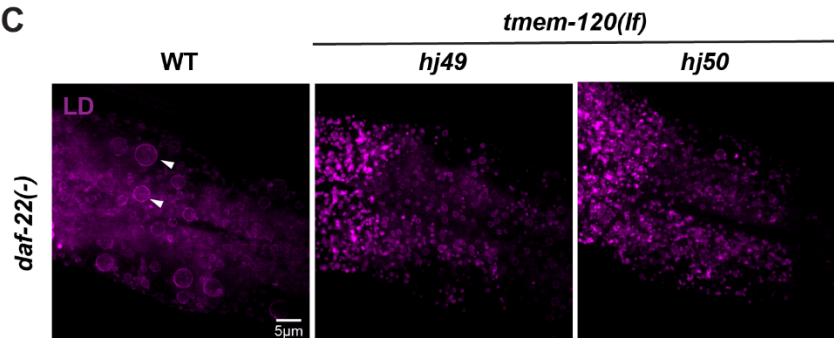

**D**

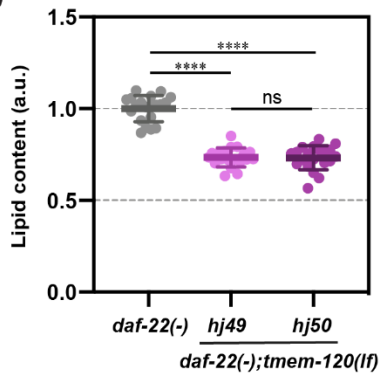

**E**

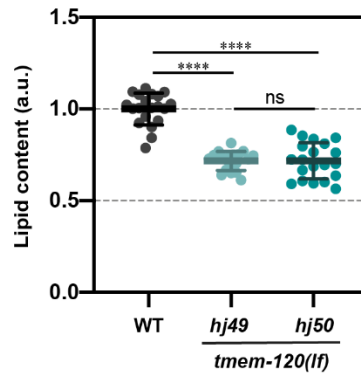

**F**

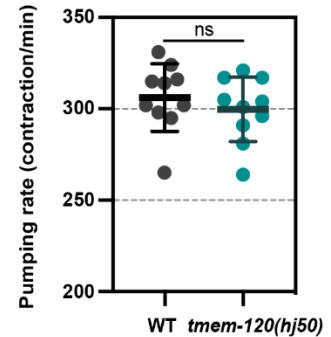

683

684 **Figure S1. TMEM-120 promotes LD expansion.** (A) Sequence alignment of *C. elegans*  
 685 TMEM-120, mouse TMEM120A and human TMEM120A. Identical residues are shaded in  
 686 grey. The mutated residues encoded by *tmem-120(hj49)* and *tmem-120(hj50)* are labeled red.  
 687 (B) Expression level of *tmem-120* in wild type (WT) and *tmem-120(hj50)* L4 stage worms  
 688 measured by real time PCR. Two independent samples for each strain. The mean value of  
 689 WT is set as 1 for comparison. (C) Visualization of LDs in *daf-22(-)*, *daf-22(-); tmem-*  
 690 *120(hj49)* and *daf-22(-); tmem-120(hj50)* larval L4 stage worms using DHS-3::mRuby  
 691 (*hj200*) as a LD marker. Each representative image is a projection of 7.5µm z stack with the  
 692 second intestinal segment in the center. Enlarged LDs are indicated by white arrowheads.

693 Label free quantification of neutral lipid content in *daf-22(-)* (n=20), *daf-22(-); tmem-*  
694 *120(hj49)* (n=19) and *daf-22(-); tmem-120(hj50)* (n=20) L4 stage worms by SRS. Each data  
695 point represents the neutral lipid content of an individual worm. (E) As in (D), but with WT  
696 (n=20), *tmem-120(hj49)* (n=19) and *tmem-120(hj50)* (n=20) L4 stage worms. (F) Pharyngeal  
697 pumping rate of WT (n=10) and *tmem-120(hj50)* (n=10) 1-day old adult worms. Each data  
698 point represents the contraction rate of an individual worm. For all graphs, bars or horizontal  
699 lines represent mean  $\pm$  SD. Statistical analysis: (B and F) unpaired t test; (D and E) one-way  
700 ANOVA followed by Tukey's multiple comparisons test. a.u., arbitrary unit. ns, not  
701 significant; \* $p < 0.05$ ; \*\*\*\* $p < 0.0001$ .

702

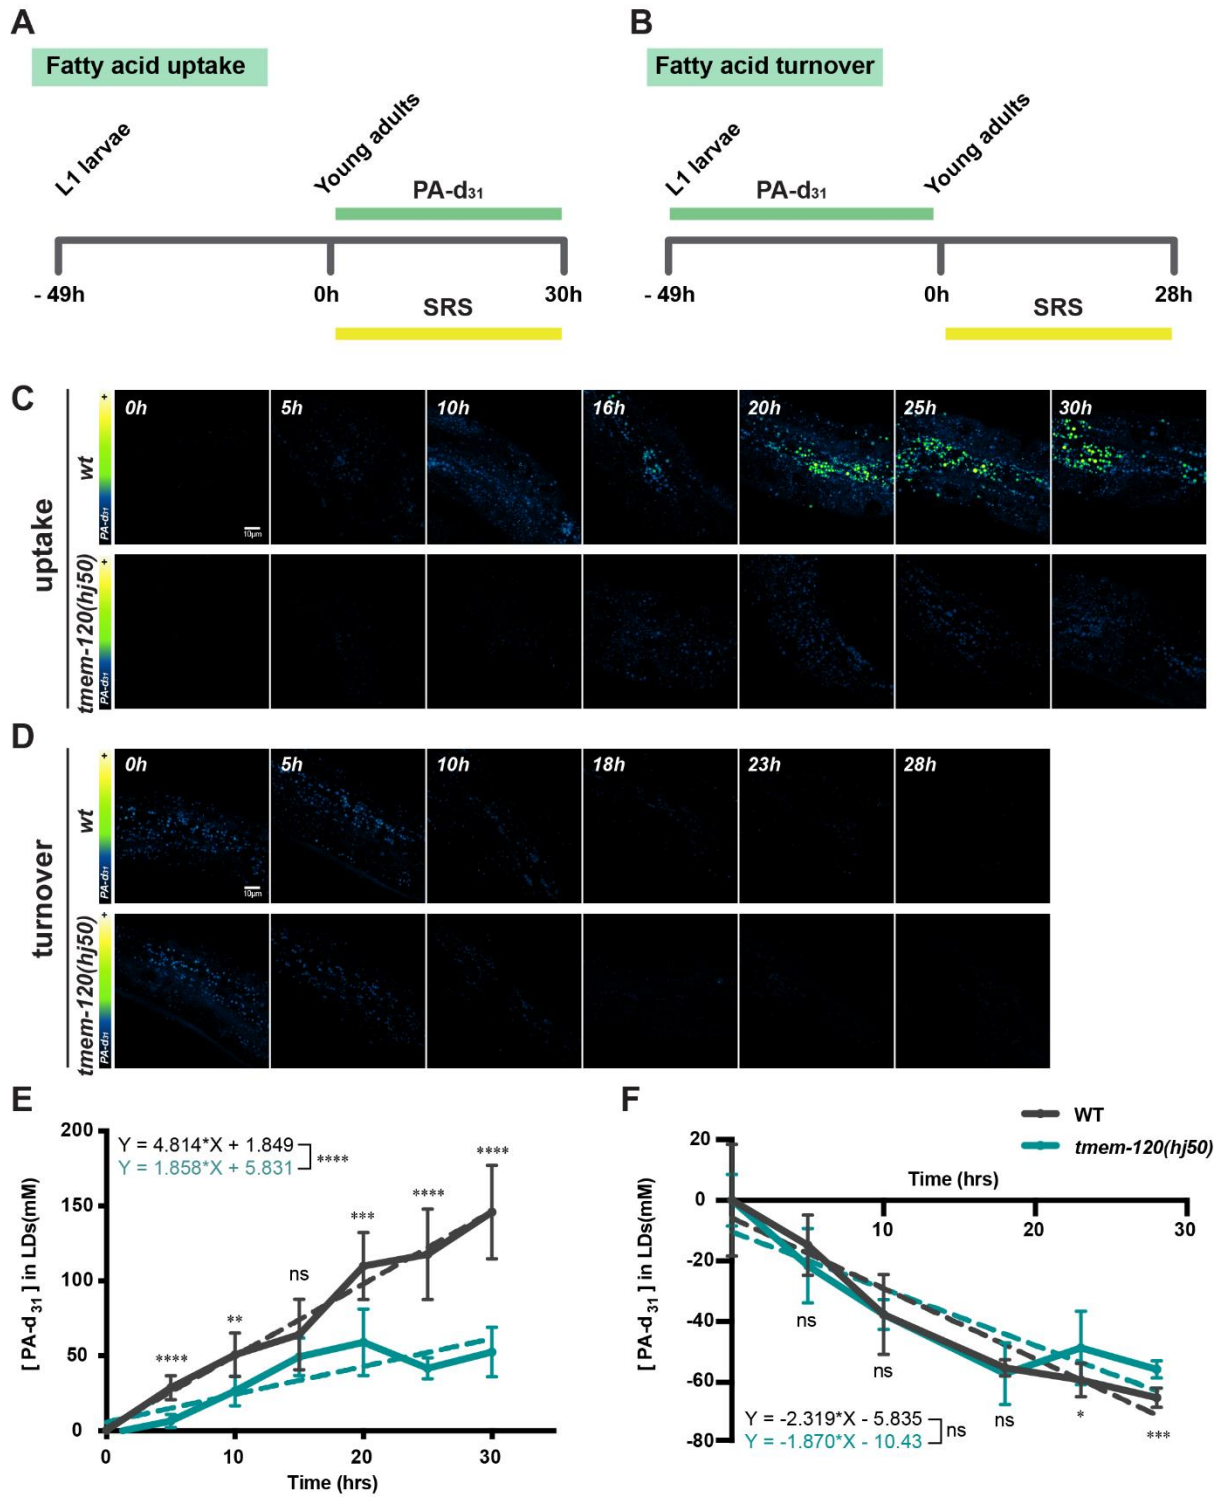

703

704 **Figure S2. TMEM-120 promotes the incorporation of fatty acids into TAG.** (A-B) The  
 705 experimental design for monitoring deuterated palmitic acid-d<sub>31</sub> (PA-d<sub>31</sub>) uptake (A) or  
 706 turnover (B). (C-D) Visualization of PA-d<sub>31</sub> incorporation (C) or turnover (D) by SRS in wild  
 707 type (wt) and *tmem-120(hj50)* worms. Representative images of a layer with the strongest  
 708 SRS signal in the first and second intestinal segments are shown. (E) Quantification of PA-

709  $d_{31}$  uptake in WT and *tmem-120(hj50)* worms shown in (C). n = 5 to 9 for each group at each  
710 time point. Straight dashed lines and equations were generated based on linear regression  
711 analysis of each group. (F) Quantification of PA- $d_{31}$  turnover in WT and *tmem-120(hj50)*  
712 worms shown in (D). n = 4 to 9 for each group at each time point. Statistical analysis:  
713 unpaired t test (for each time point). ns, not significant; \*p < 0.05; \*\*p < 0.01; \*\*\*p <  
714 0.001; \*\*\*\*p < 0.0001.

715

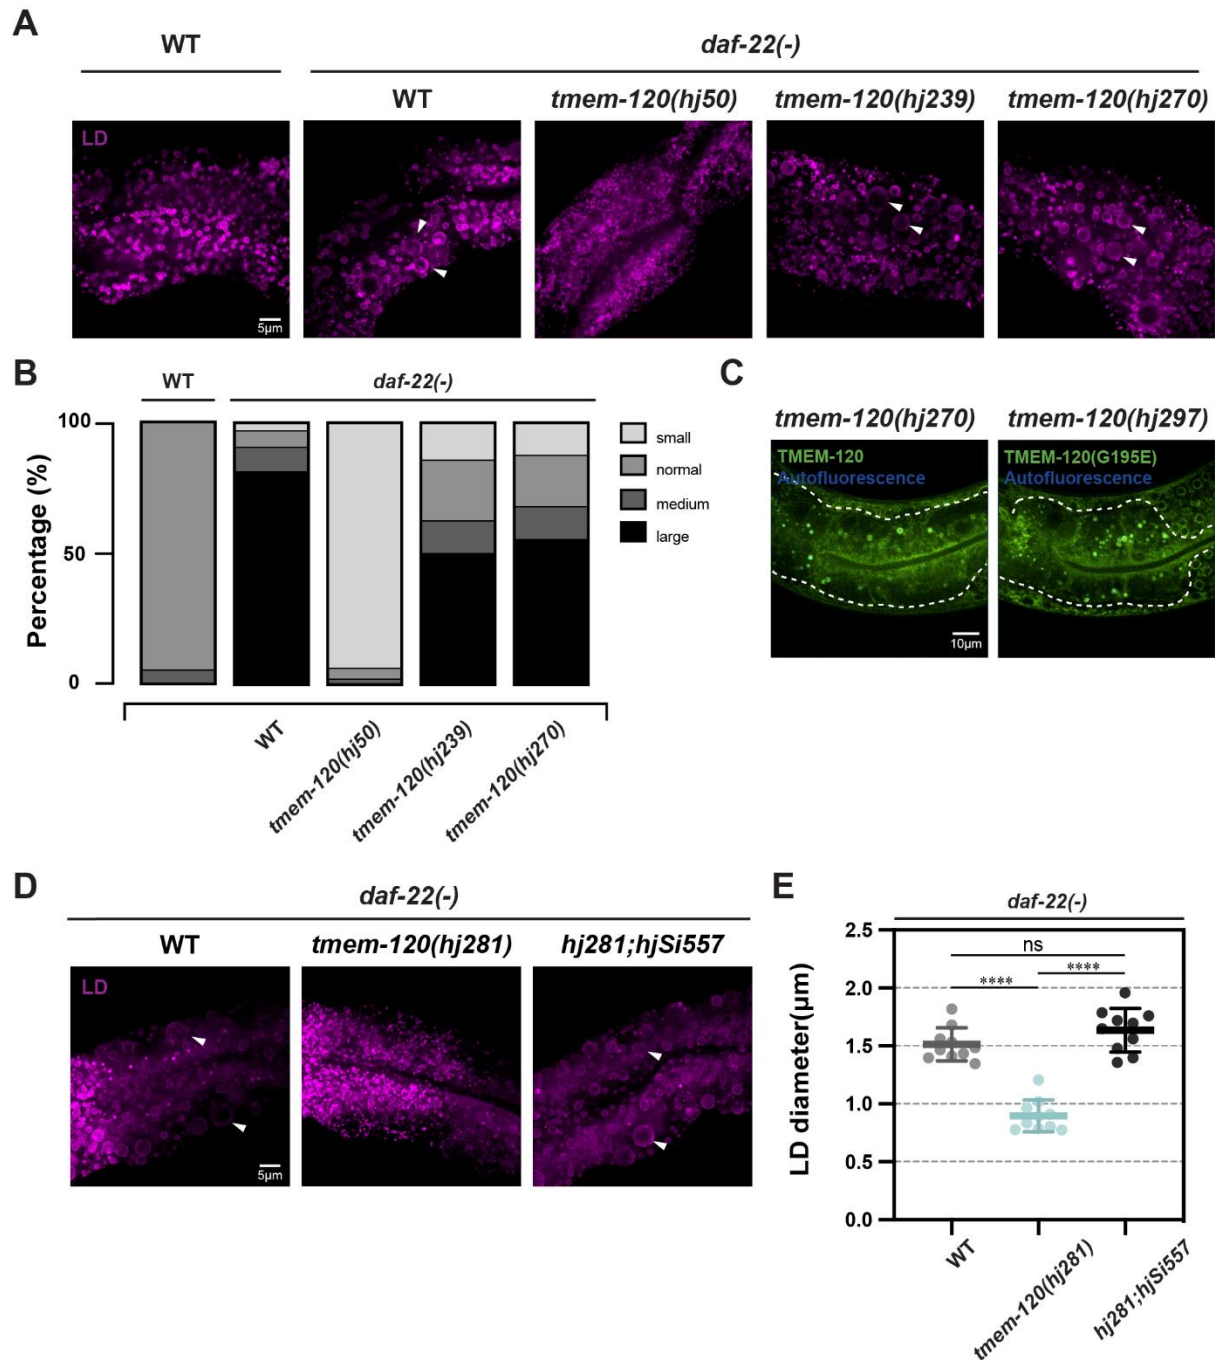

716

717 **Figure S3. Functional characterization of TMEM-120 GFP fusion proteins. (A)**

718 Visualization of LDs in wild type (WT), *daf-22(-)*, *daf-22(-); tmem-120(hj50)*, *daf-22(-);*

719 *tmem-120(hj239)* and *daf-22(-); tmem-120(hj270)* L4 stage worms, using DHS-3::mRuby

720 (*hj200*) as a LD marker. Each representative image is a projection of 7.5µm z stack with the

721 second intestinal segment in the center. Enlarged LDs are indicated by white arrowheads. (B)

722 Quantification of percentage of WT (n=57), *daf-22(-)* (n=64), *daf-22(-); tmem-120(hj50)*

723 (n=48), *daf-22(-); tmem-120(hj239)* (n=56) and *daf-22(-); tmem-120(hj270)* (n=56) 5-day old

724 adult worms with small ( $D_L < 1.0\mu\text{m}$ ), normal ( $1.0\mu\text{m} < D_L < 3\mu\text{m}$ ), medium ( $3\mu\text{m} < D_L <$

725 5 $\mu$ m) and large (5 $\mu$ m < D<sub>L</sub>) LDs. D<sub>L</sub>, diameter of the largest LD in the second intestinal  
726 segment of an individual worm. Data combined from 3 independent groups of worms (n = 14  
727 to 22 for each group) for each strain. (C) Visualization of GFP::*TMEM-120* (*hj270*) and  
728 GFP::*TMEM-120*(G195E) (*hj297*) in L4 stage worms. Representative images of a single  
729 focal plane of the first and second intestinal segments are shown. The intestine is enclosed by  
730 dashed lines. (D) Visualization of LDs in *daf-22(-)* and *daf-22(-); tmem-120(hj281)* and *daf-*  
731 *22(-); tmem-120(hj281); hjSi557[vha-6p::*gfp>::tmem-120]* L4 stage worms, using DHS-  
732 3::*mRuby* (*hj200*) as a LD marker. *tmem-120(hj281)* was generated by Cre-loxP based  
733 excision of *tmem-120(hj239)*. Each representative image is a projection of 7.5 $\mu$ m z stack with  
734 the second intestinal segment in the center. Enlarged LDs are indicated by white arrowheads.  
735 (E) Quantification of LD size of worms from (D). Each data point represents average LD  
736 diameter of an individual worm. Total number of LDs quantified: *daf-22(-)* = 1276, *daf-22(-);*  
737 *tmem-120(hj281)* = 1216 and *daf-22(-); tmem-120(hj281); hjSi557* = 1279. Horizontal bars  
738 represent mean  $\pm$  SD. Statistical analysis: one-way ANOVA followed by Tukey's multiple  
739 comparisons test. ns, not significant; \*\*\*\*p < 0.0001.*

740

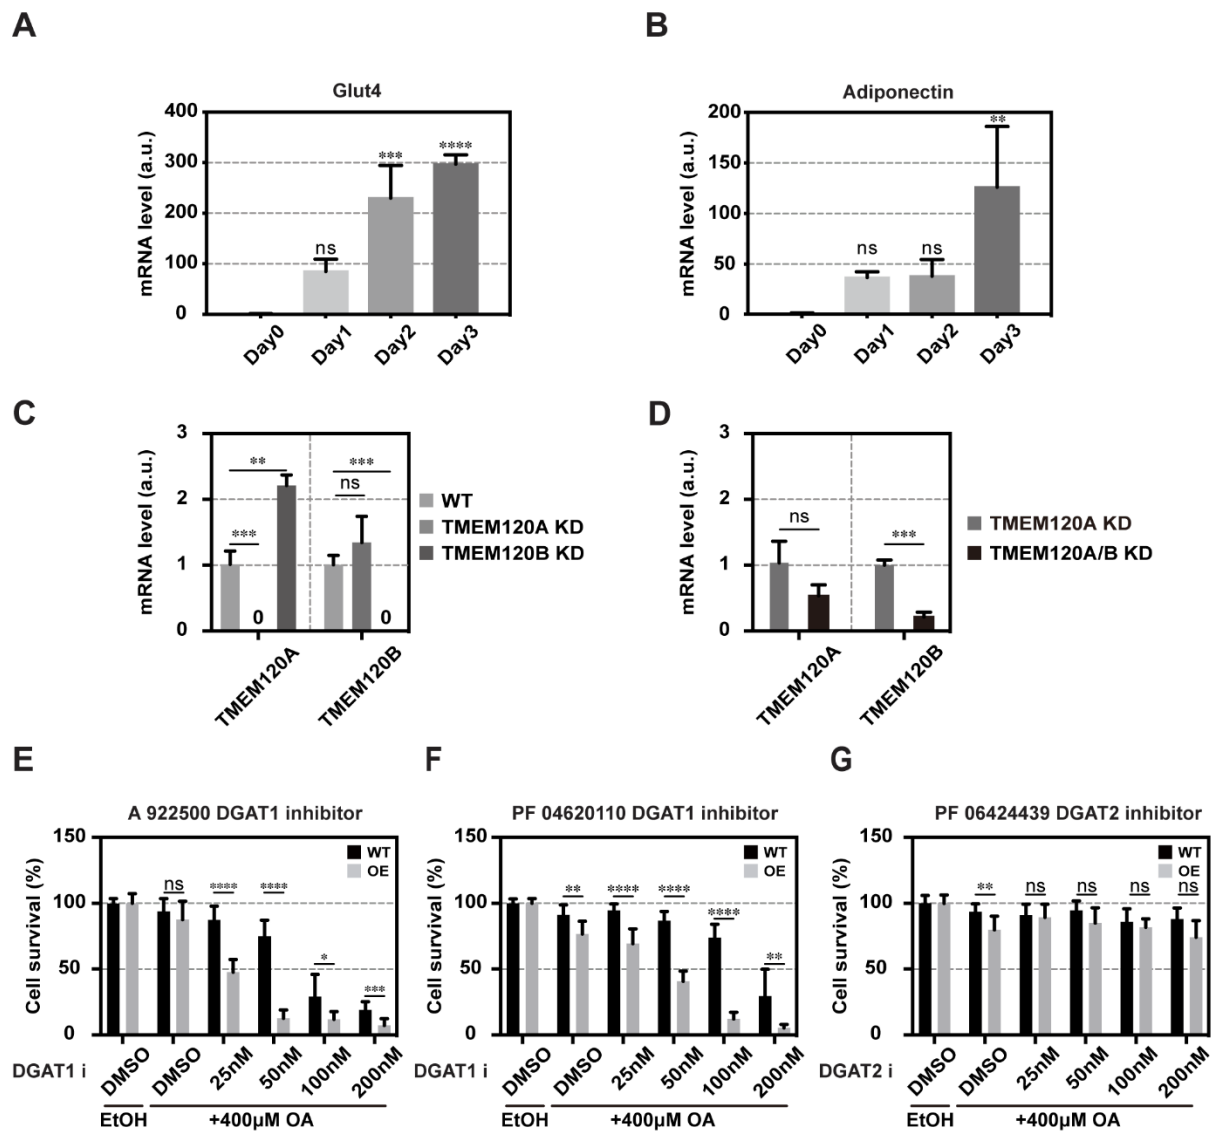

741

742 **Figure S4. TMEM120A acts upstream of DGAT1 in mammalian cells.** (A-B) The  
 743 expression level of mature adipocyte markers Glut4 and Adiponectin during OP9 pre-  
 744 adipocyte differentiation measured by real time PCR. Mean + SD from three independent  
 745 samples is shown. The mean value on Day 0 is set as 1. a.u., arbitrary unit. (C) The  
 746 expression level of TMEM120A and TMEM120B in wild type (WT), TMEM120A KD,  
 747 TMEM120B KD cells, measured by real time PCR. Mean + SD from three independent  
 748 samples of each cell line is shown. The mean value of WT cells is set as 1. (D) The  
 749 expression level of TMEM120A and TMEM120B in TMEM120A KD (parental to the double  
 750 KD cells) and TMEM120A+TMEM120B KD cells, measured by real time PCR. Mean + SD  
 751 from three independent samples of each cell line is shown. The mean value of TMEM120A  
 752 KD cells is set as 1. (E) Quantification of cell survival for WT and TMEM120A  
 753 overexpressing (OE) COS7 cells treated with oleic acid (OA) and increasing concentration of



754 DGAT1 inhibitor (A922500), based on crystal violet staining. Solvent control: ethanol (oleic  
755 acid) and DMSO (DGAT1i). Data summarized from 9 independent wells, performed on 3  
756 separate days, for each cell line. Mean + SD is shown. (F) As in (E), but with DGAT1  
757 inhibitor (PF04620110). (G) As in (E), but with DGAT2 inhibitor (PF06424439). Statistical  
758 analysis: (A-B) One-way ANOVA followed by Dunnett's multiple comparisons test. (C-D)  
759 unpaired t-test; (E-G) multiple t-test. ns, not significant; \* $p < 0.05$ ; \*\* $p < 0.01$ ; \*\*\* $p < 0.001$ ;  
760 \*\*\*\* $p < 0.0001$ .
